# Supplementary figures and images for: Synthesis, SAR studies, and insecticidal activities of certain N-heterocycles derived from 3-((2-chloroquinolin-3-yl)methylene)-5-phenylfuran-2(3H)-one against Culex pipiens L. larvae
Source: Royal Society of Chemistry journal article supplement (doi:10.1039/d2ra02388a), 2022-01-01

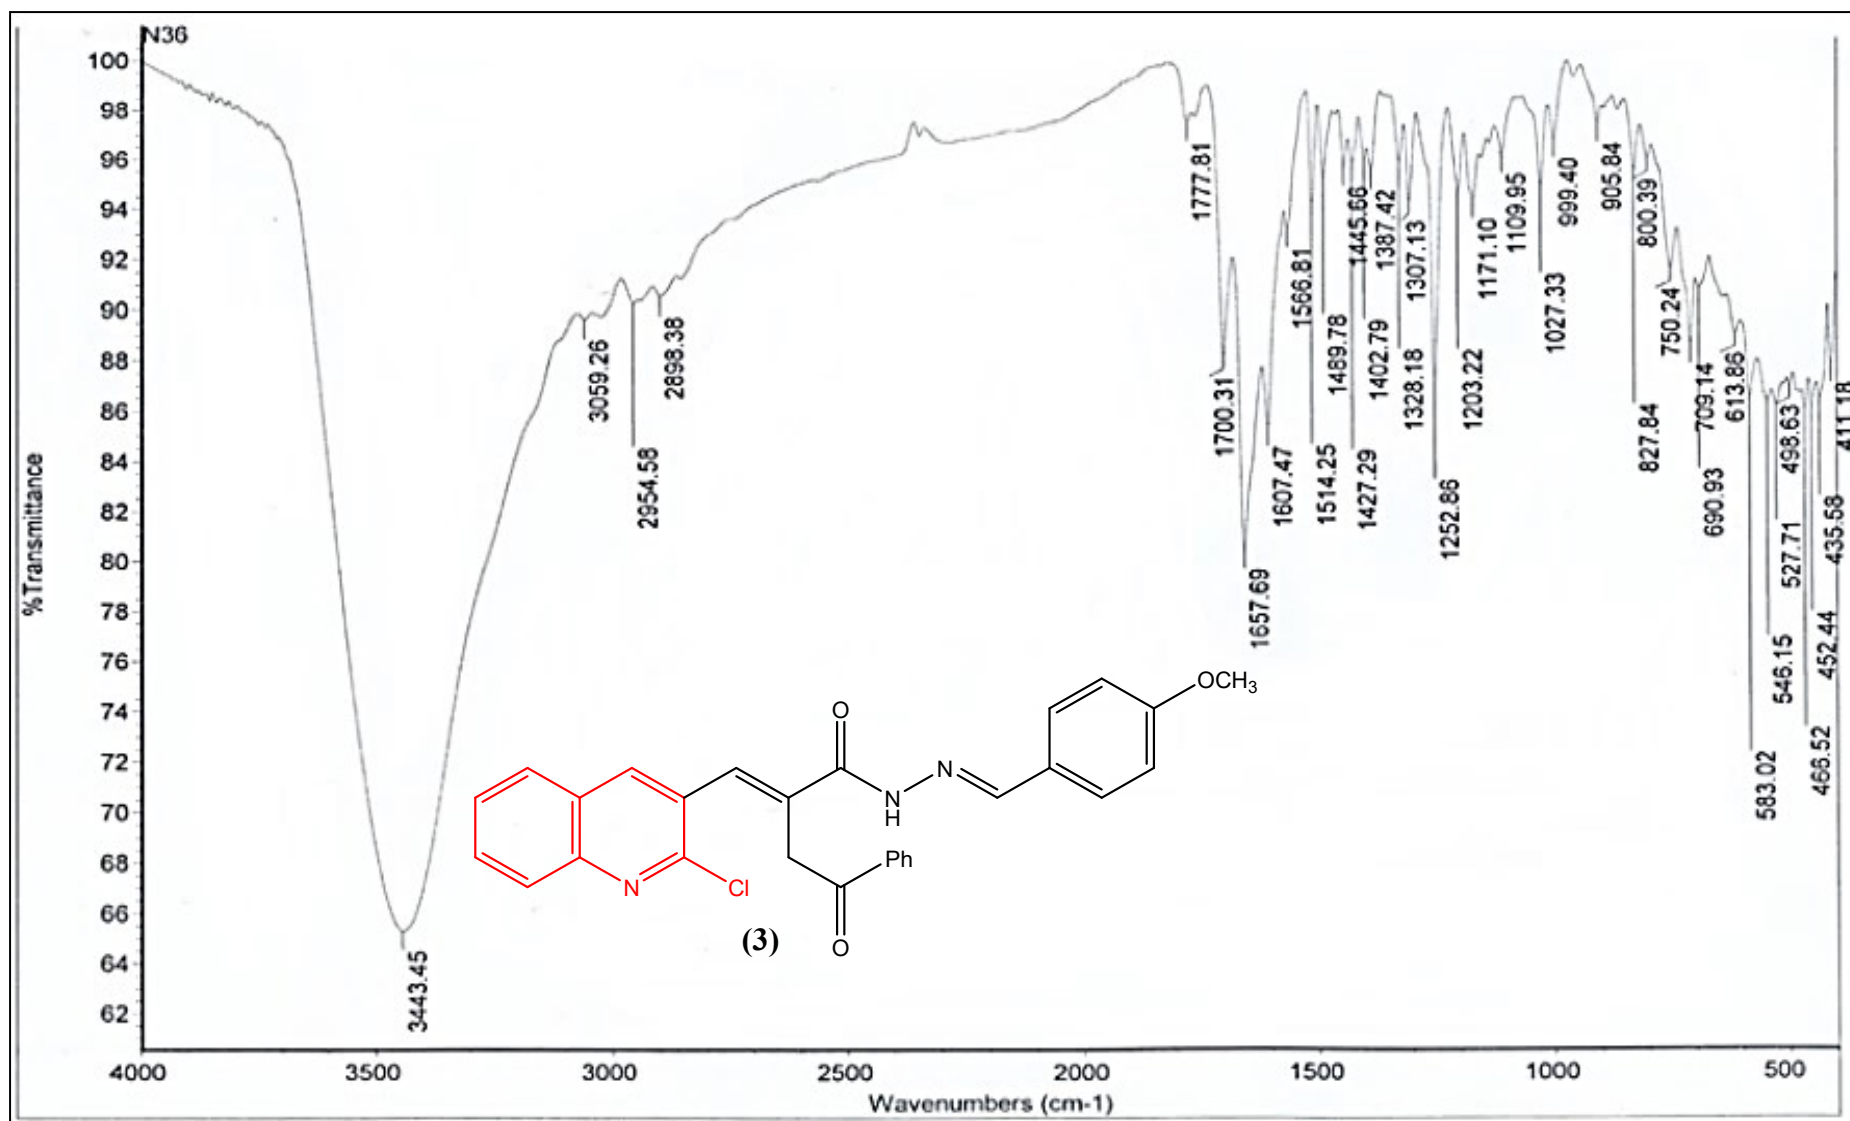

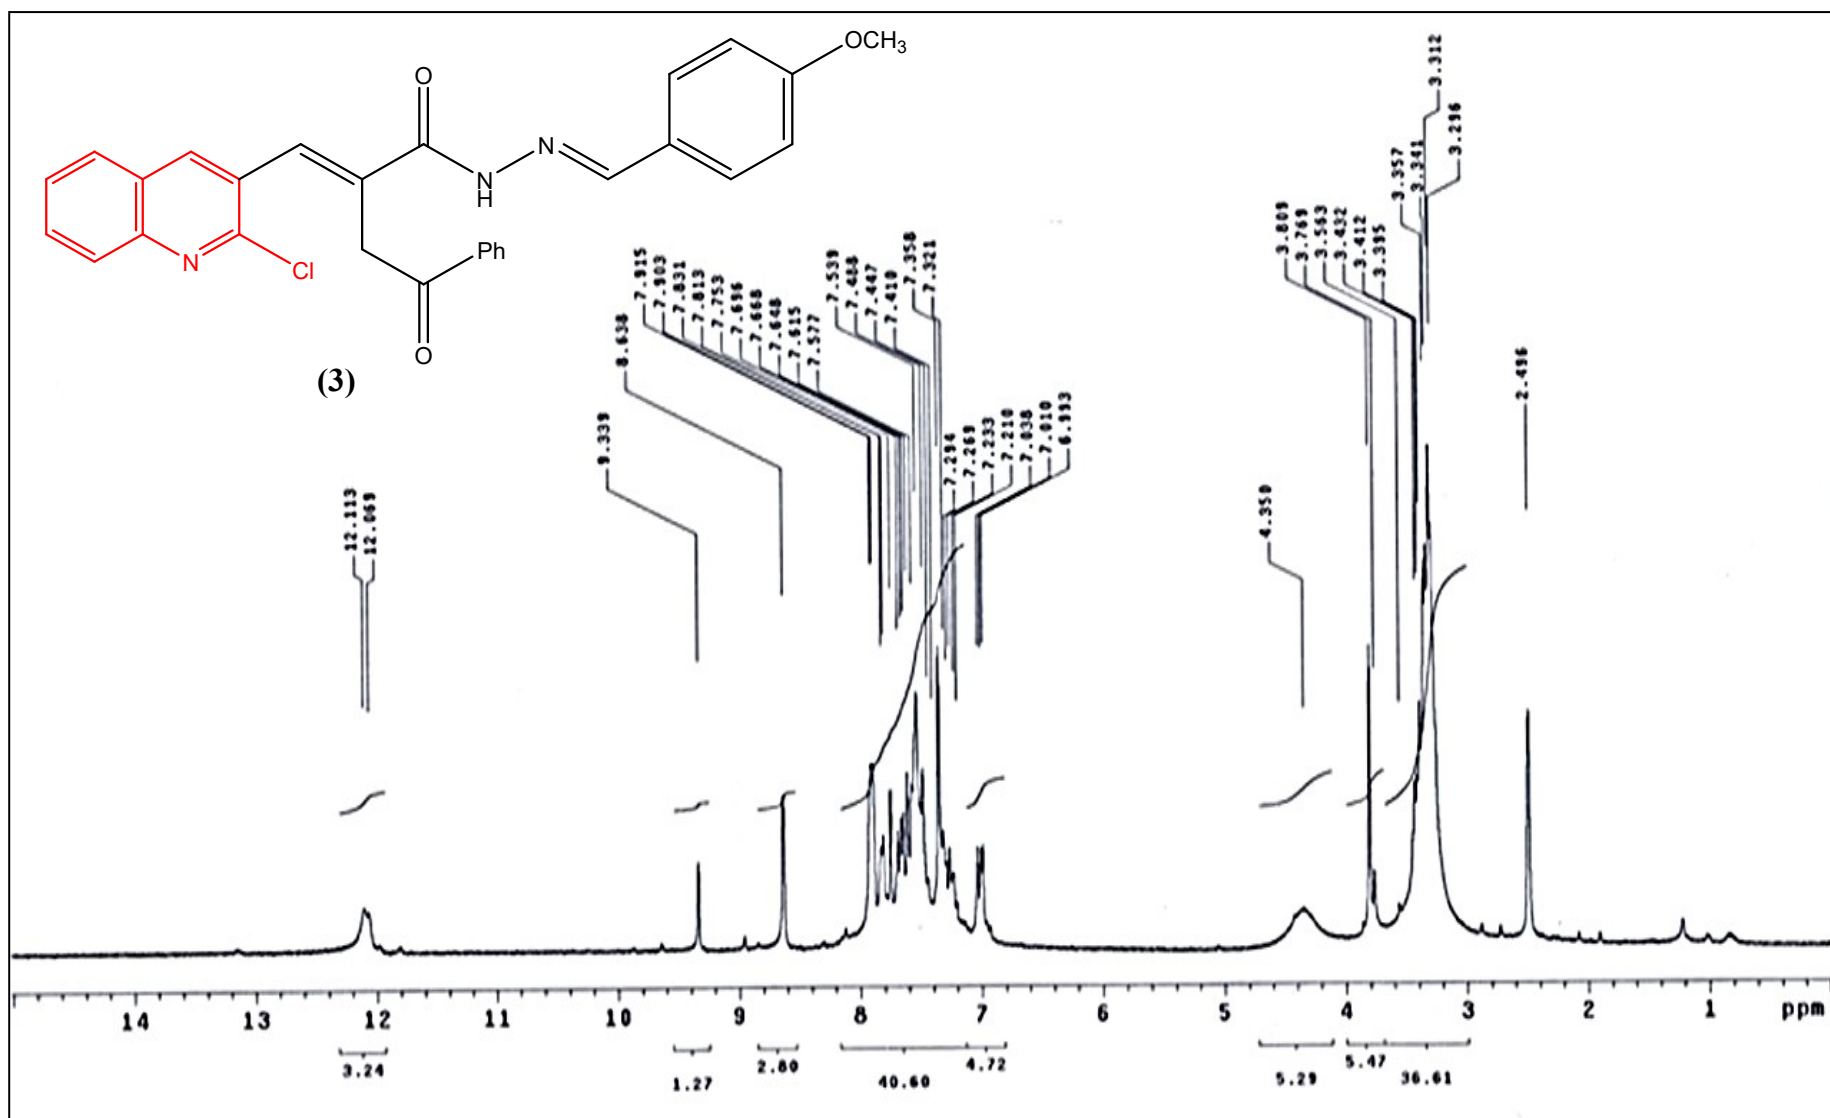

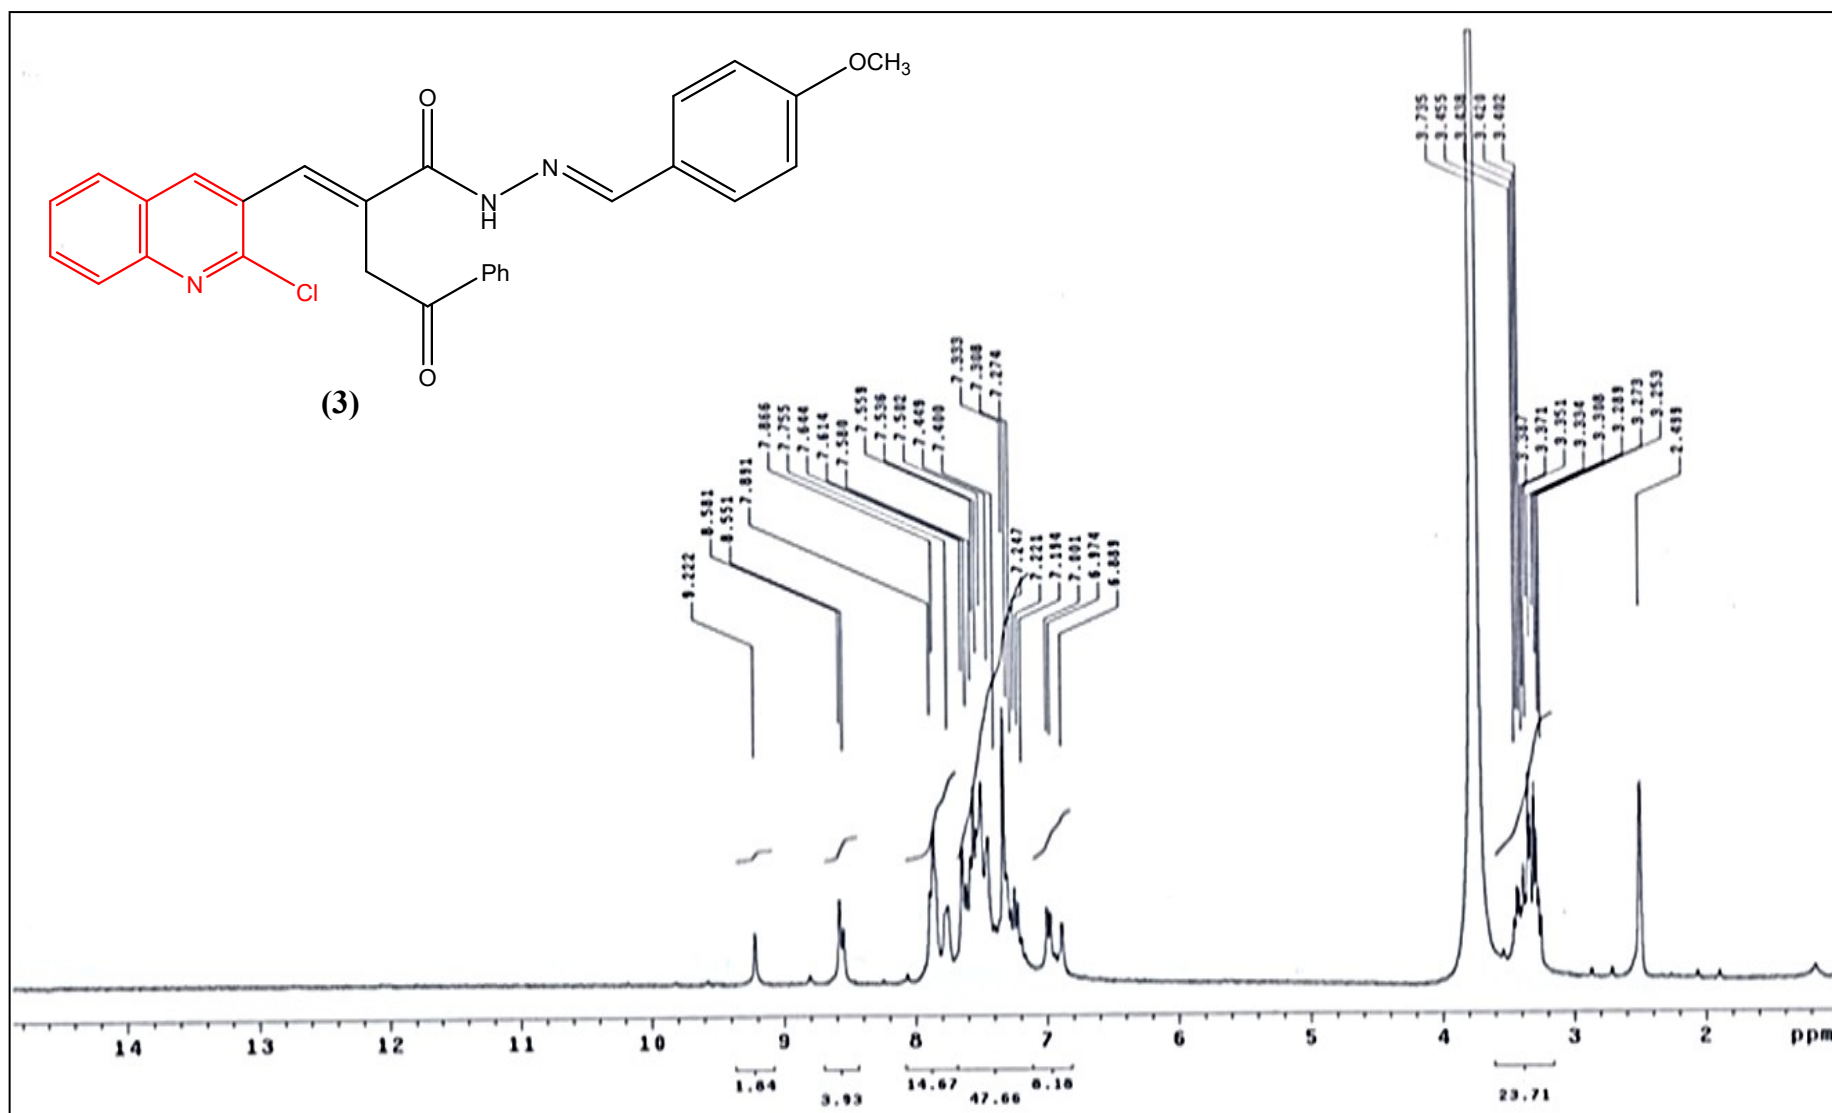

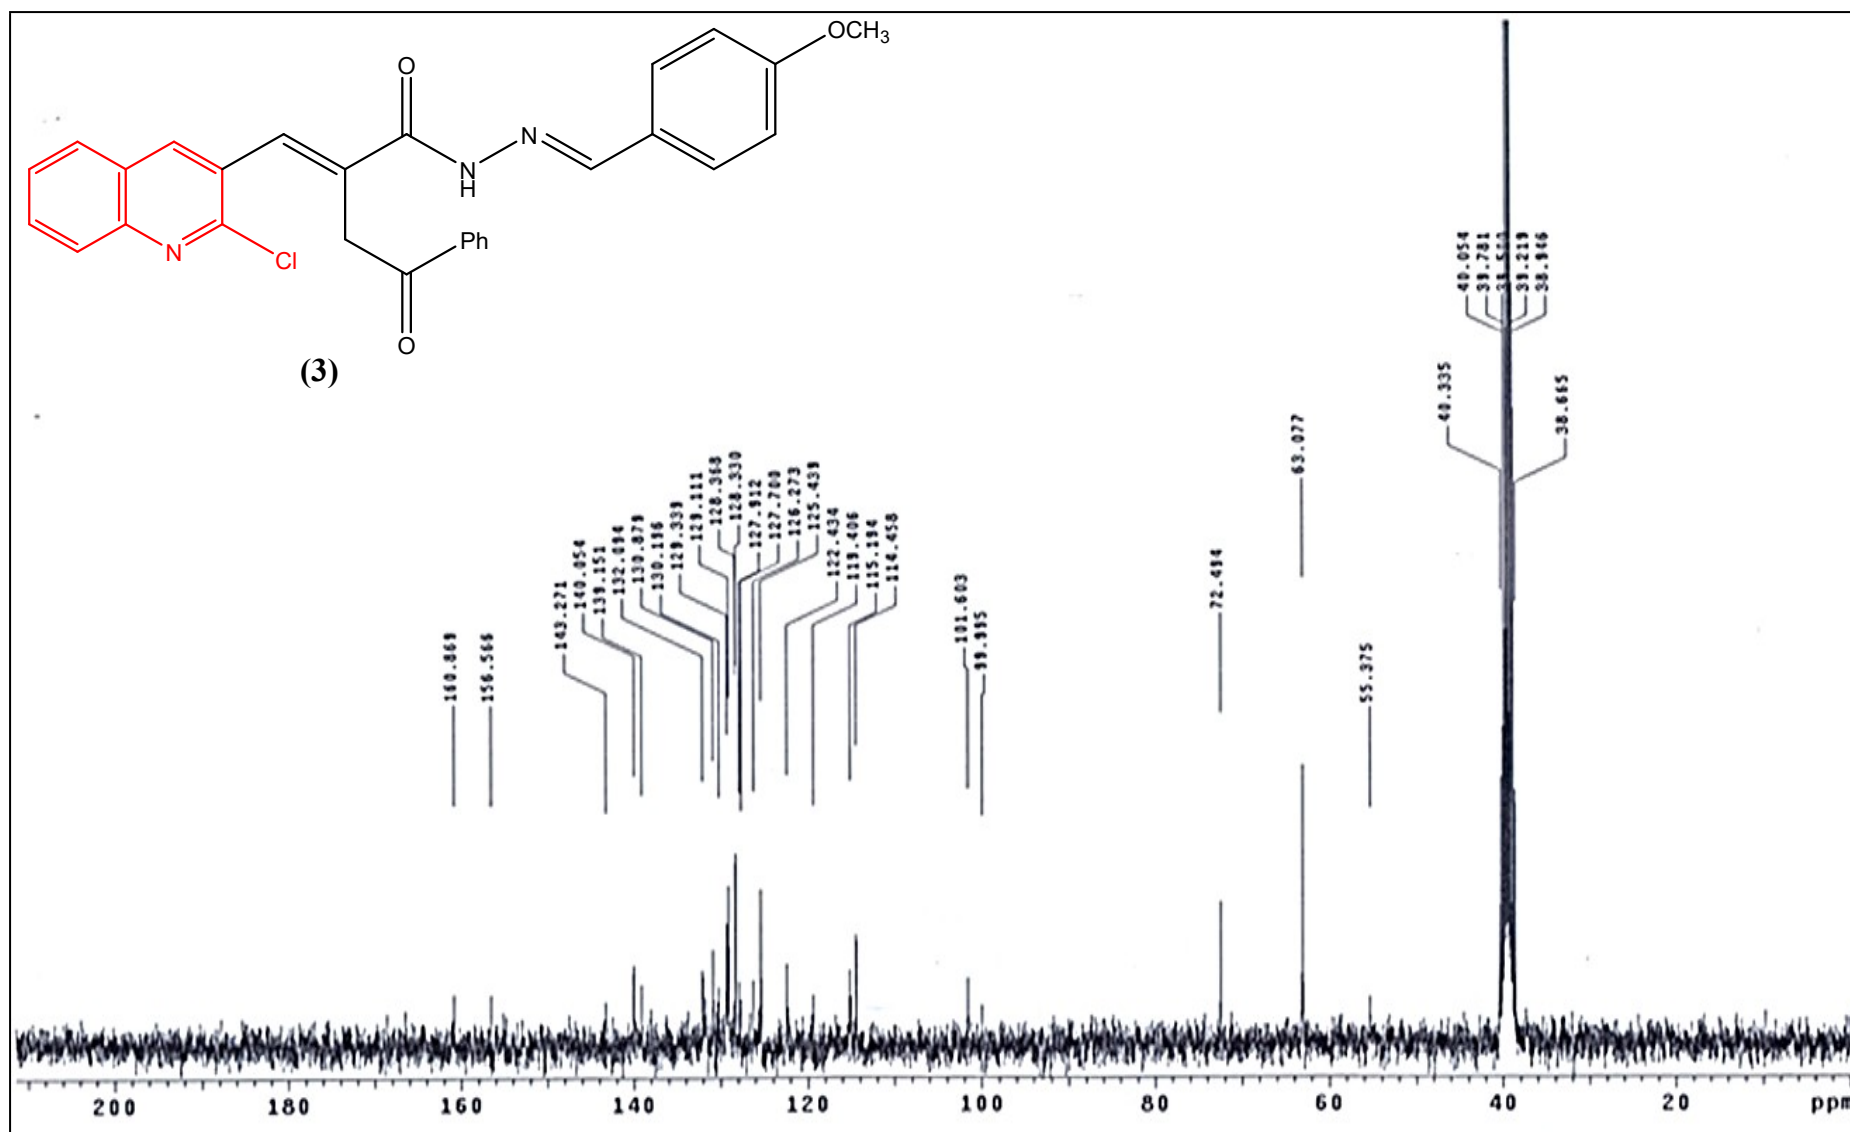

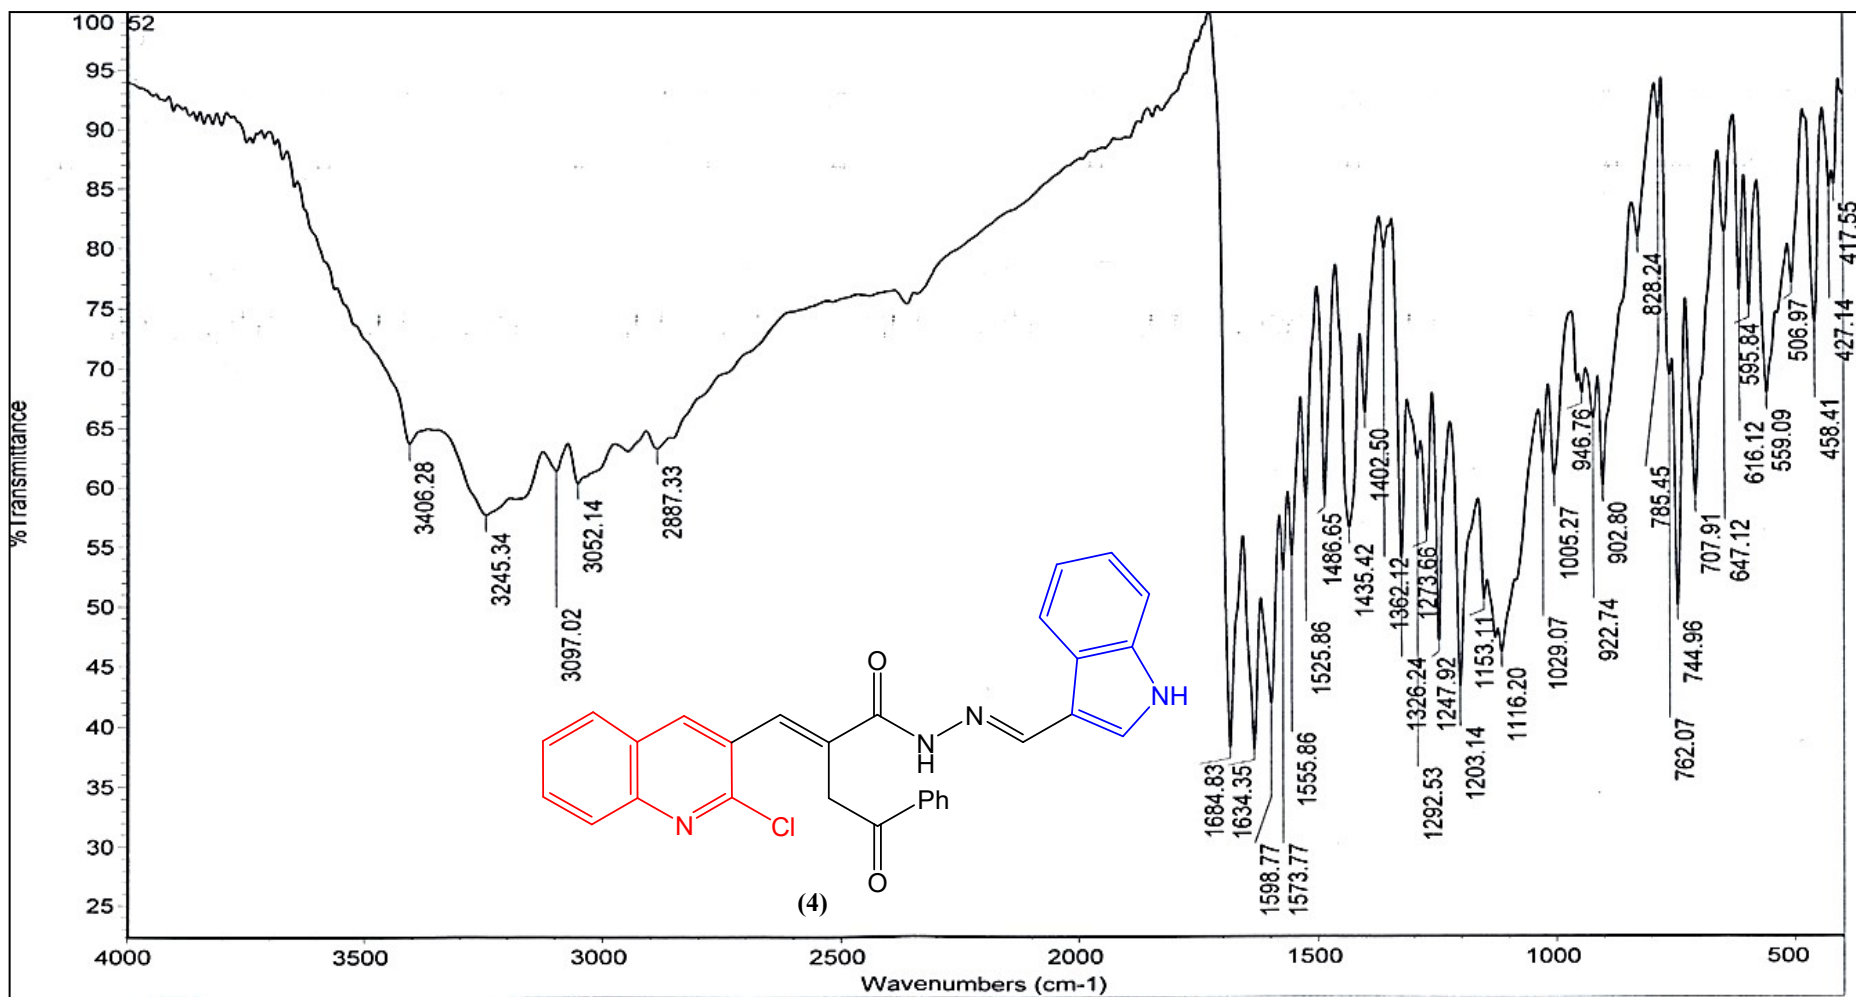

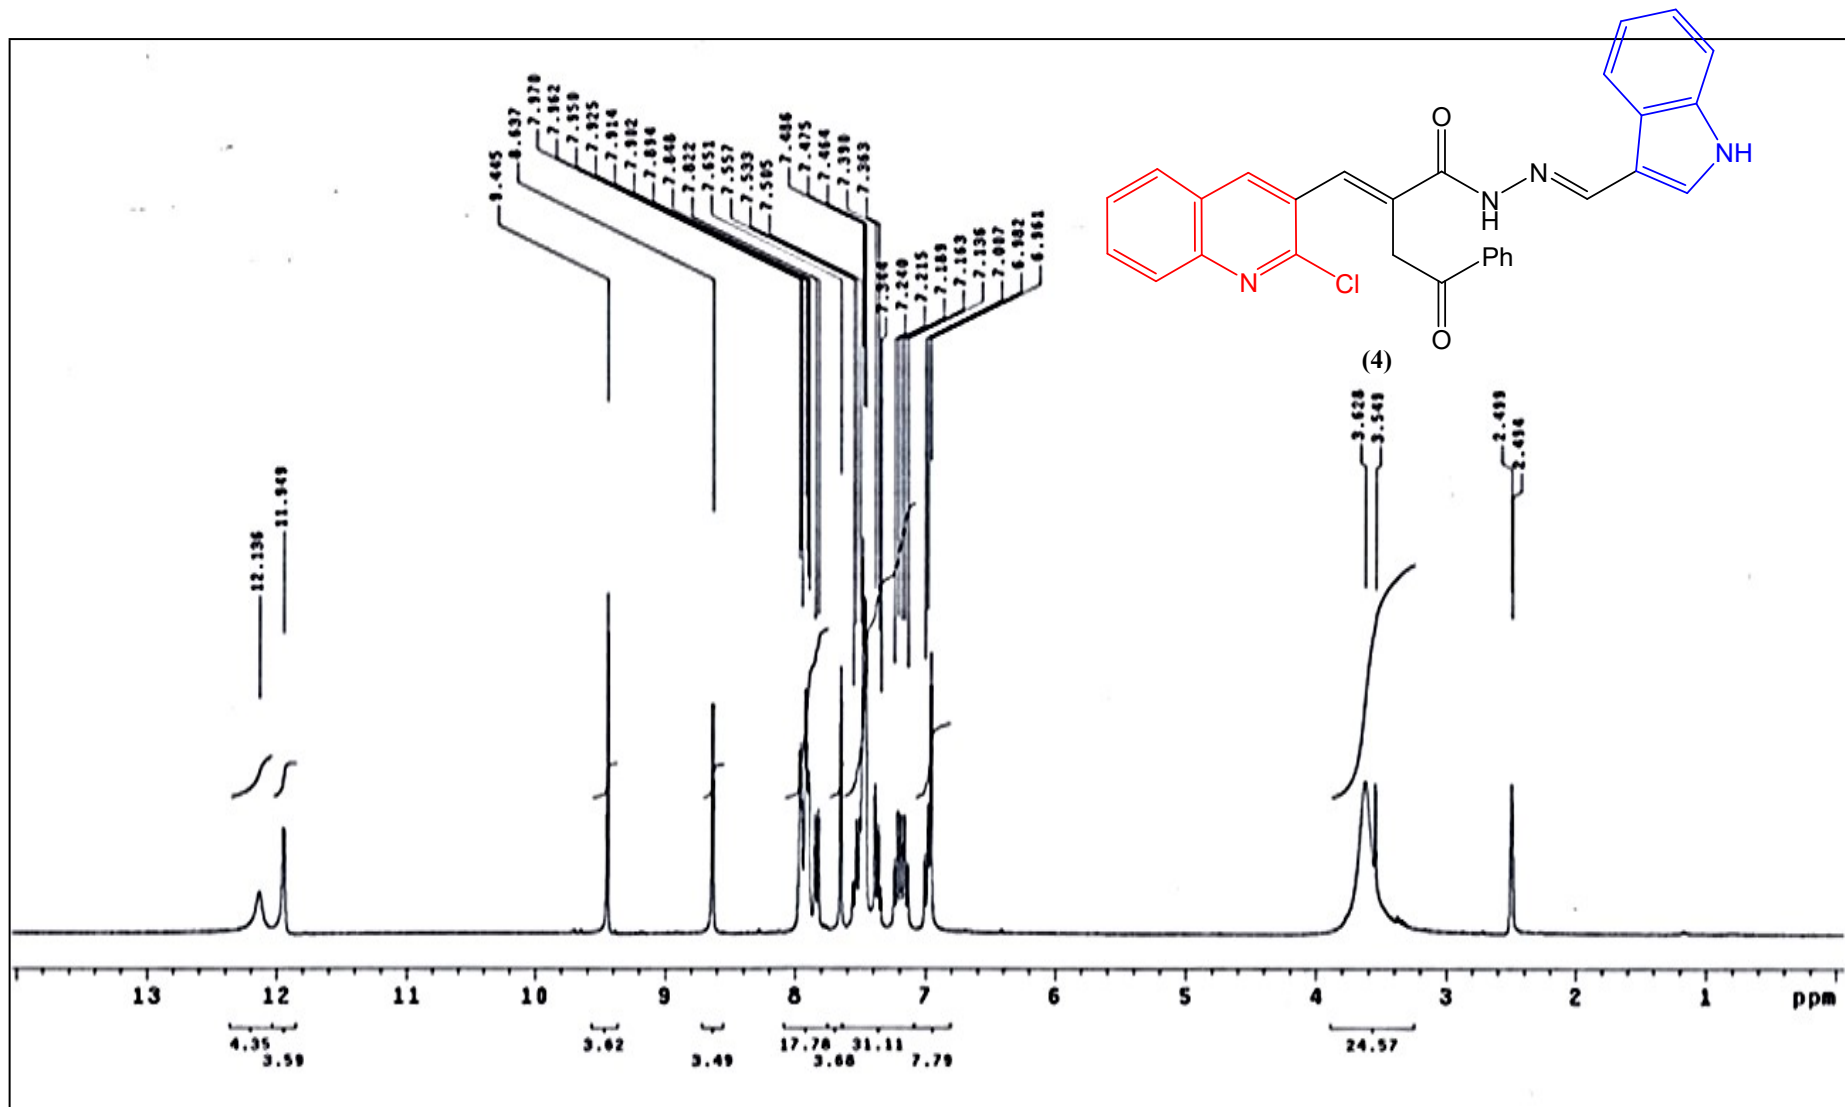

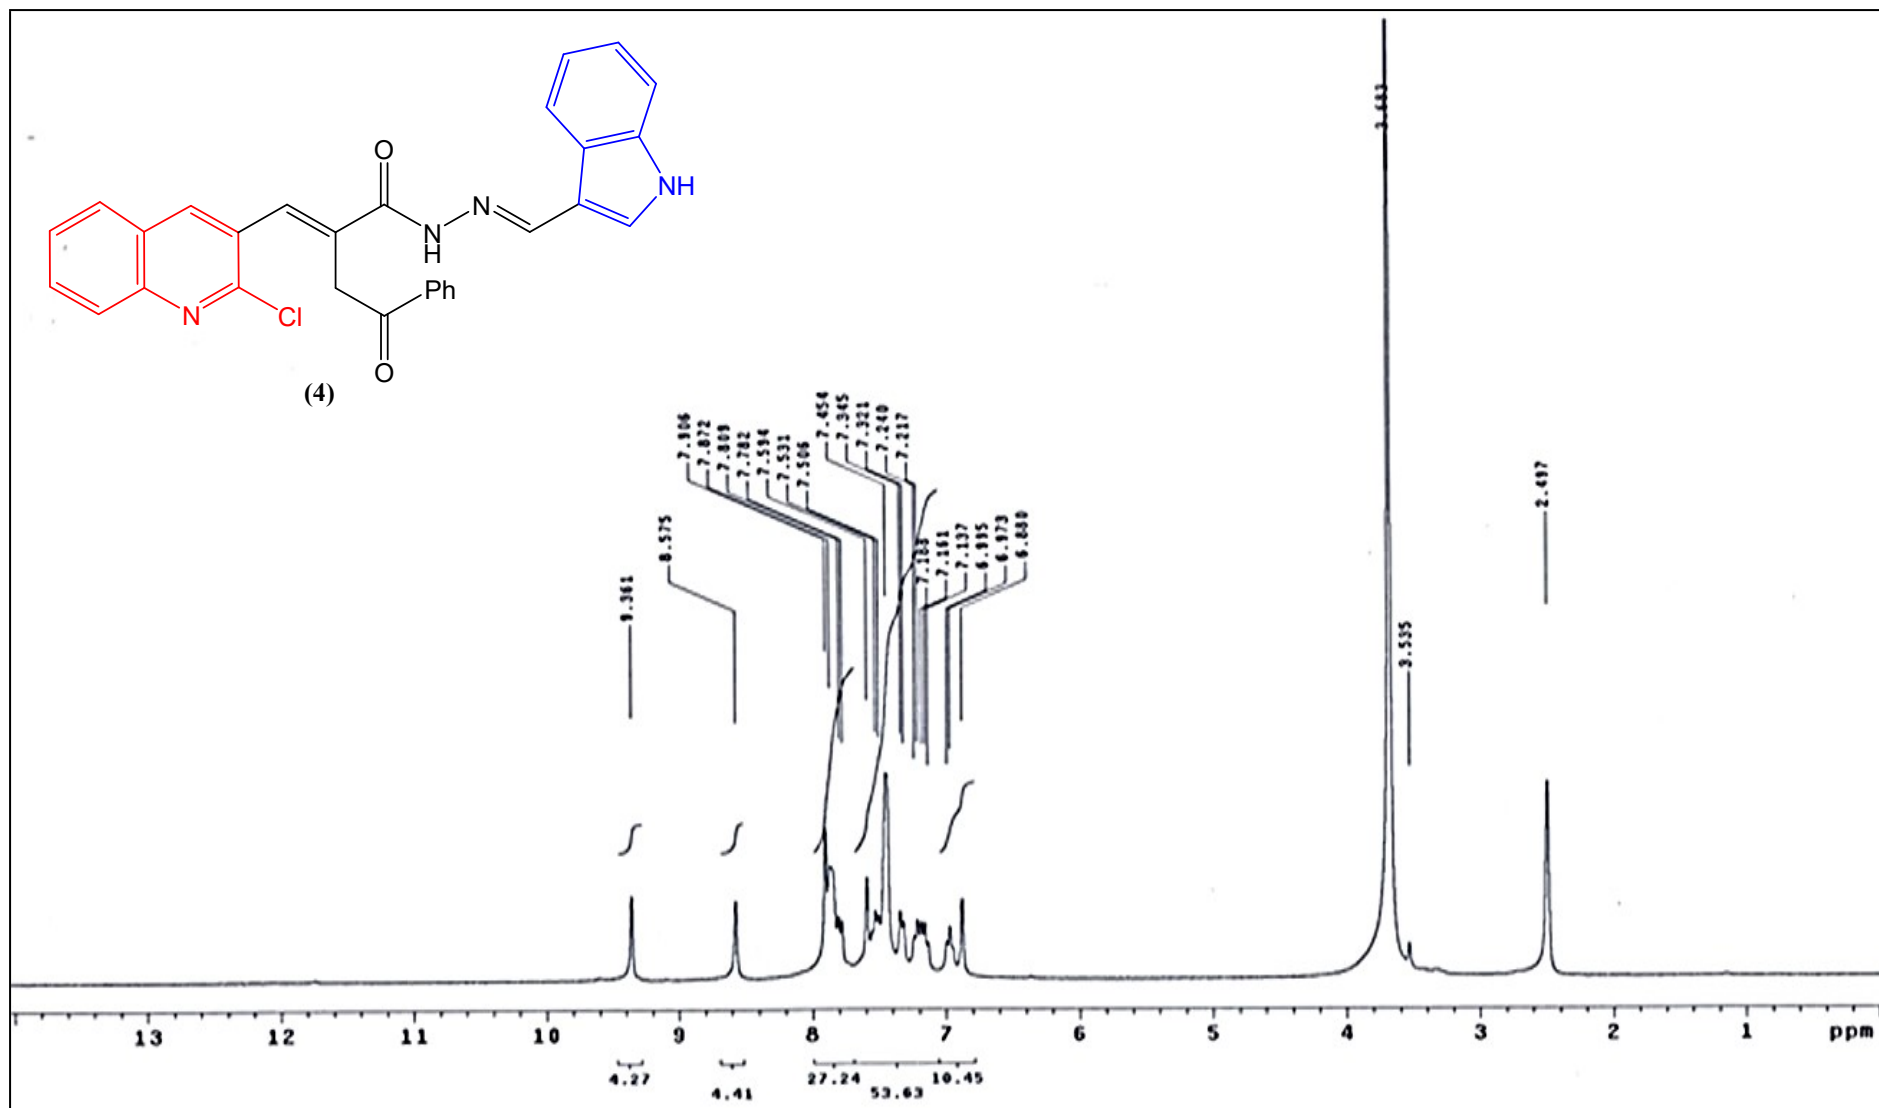

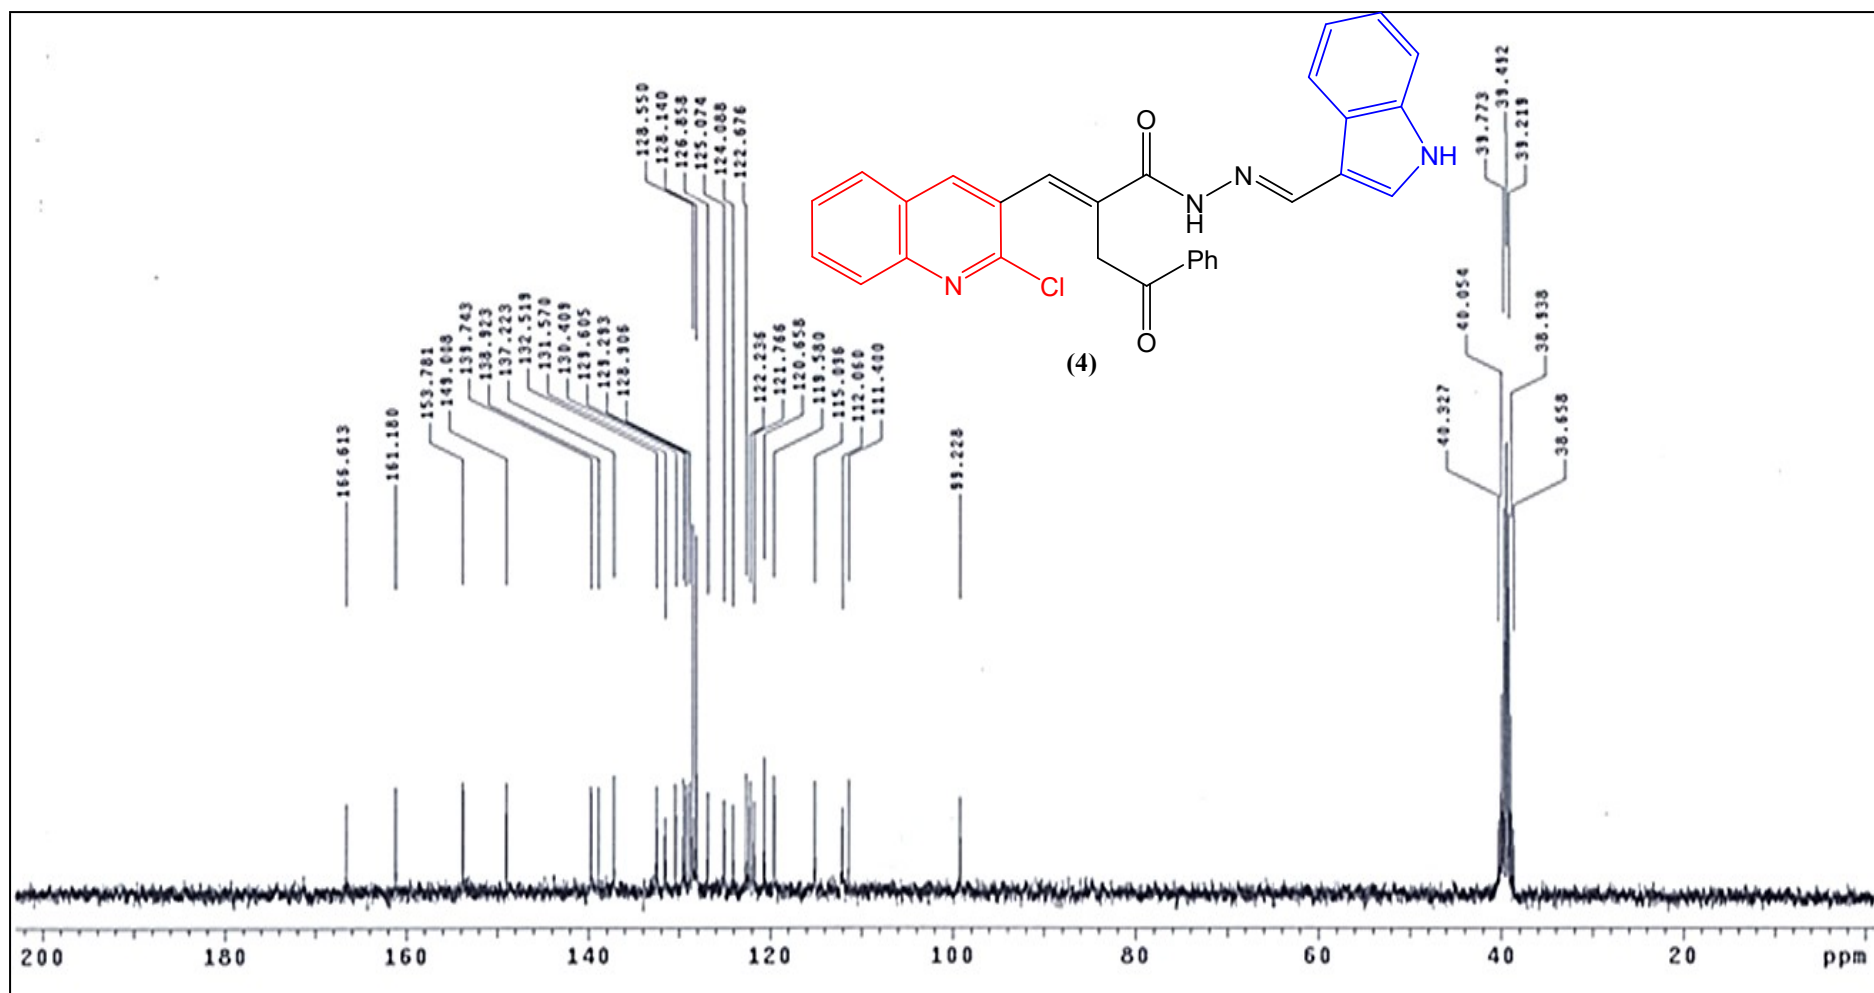



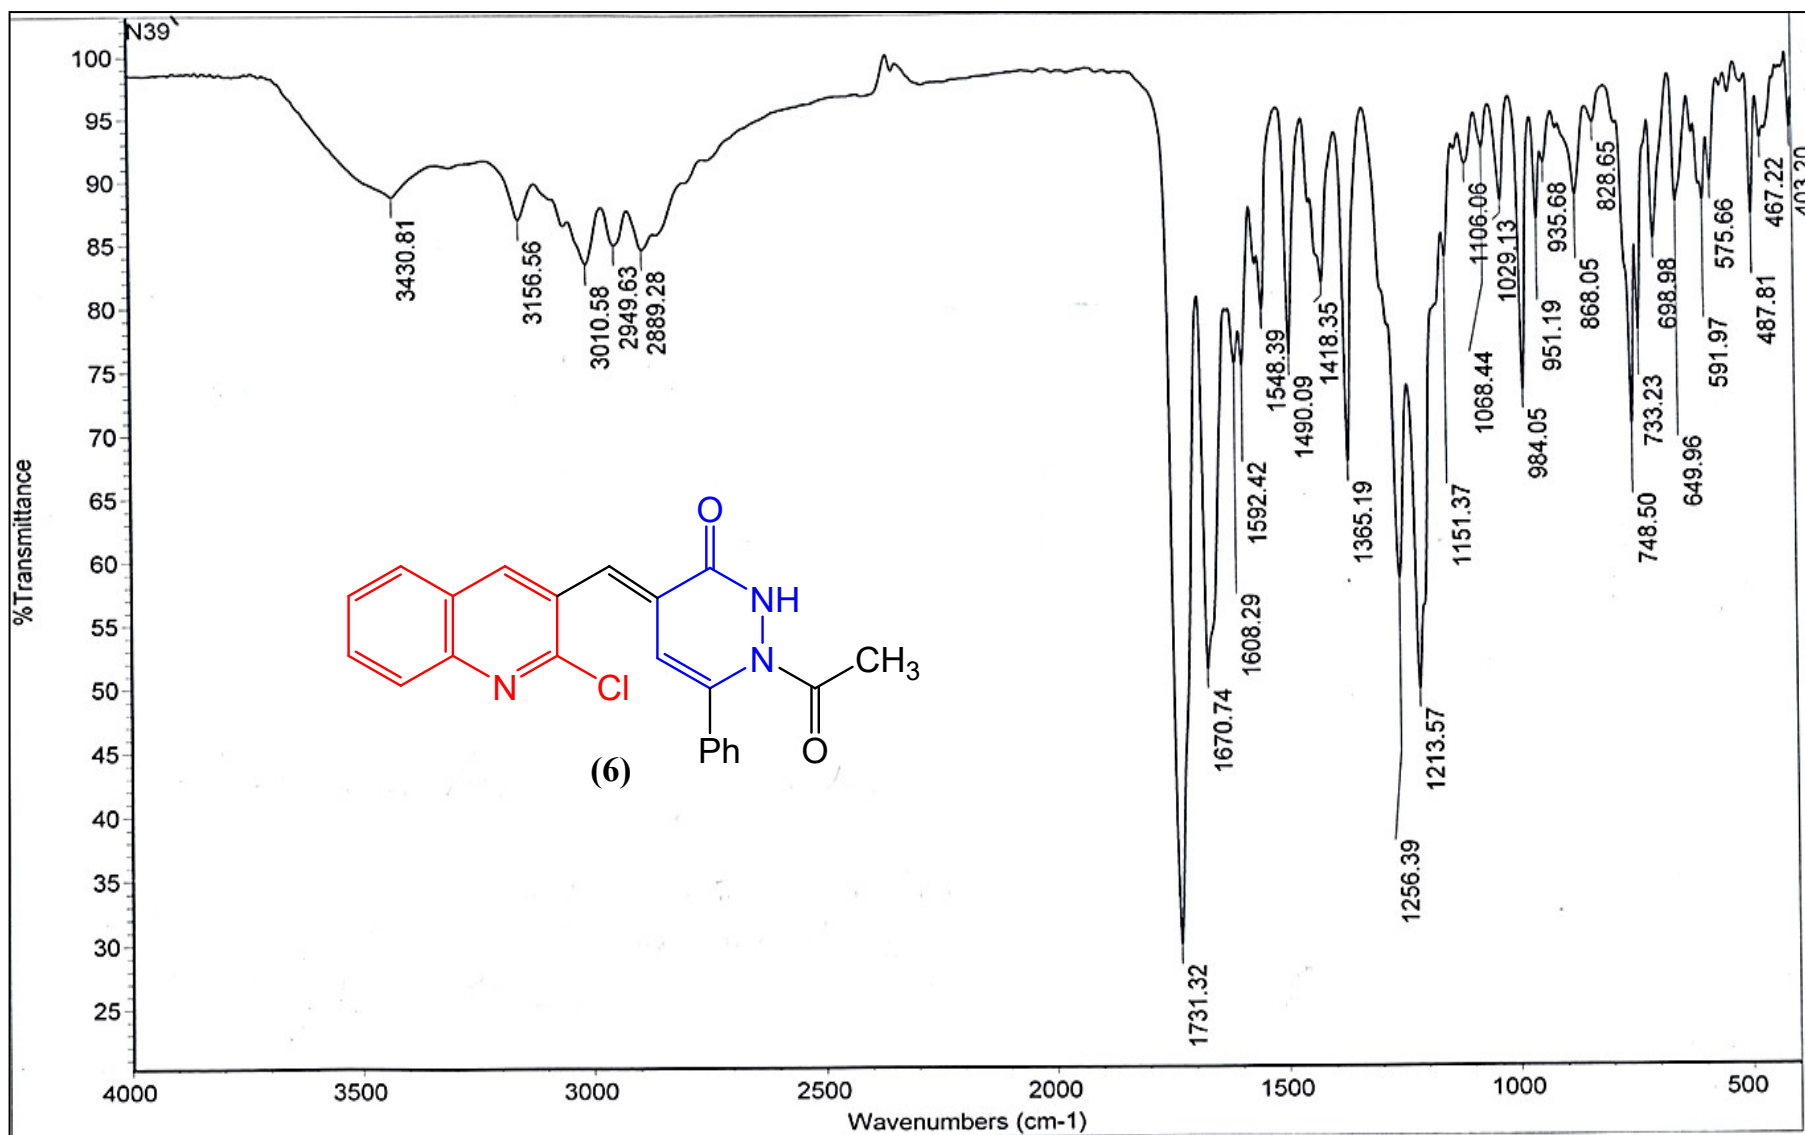

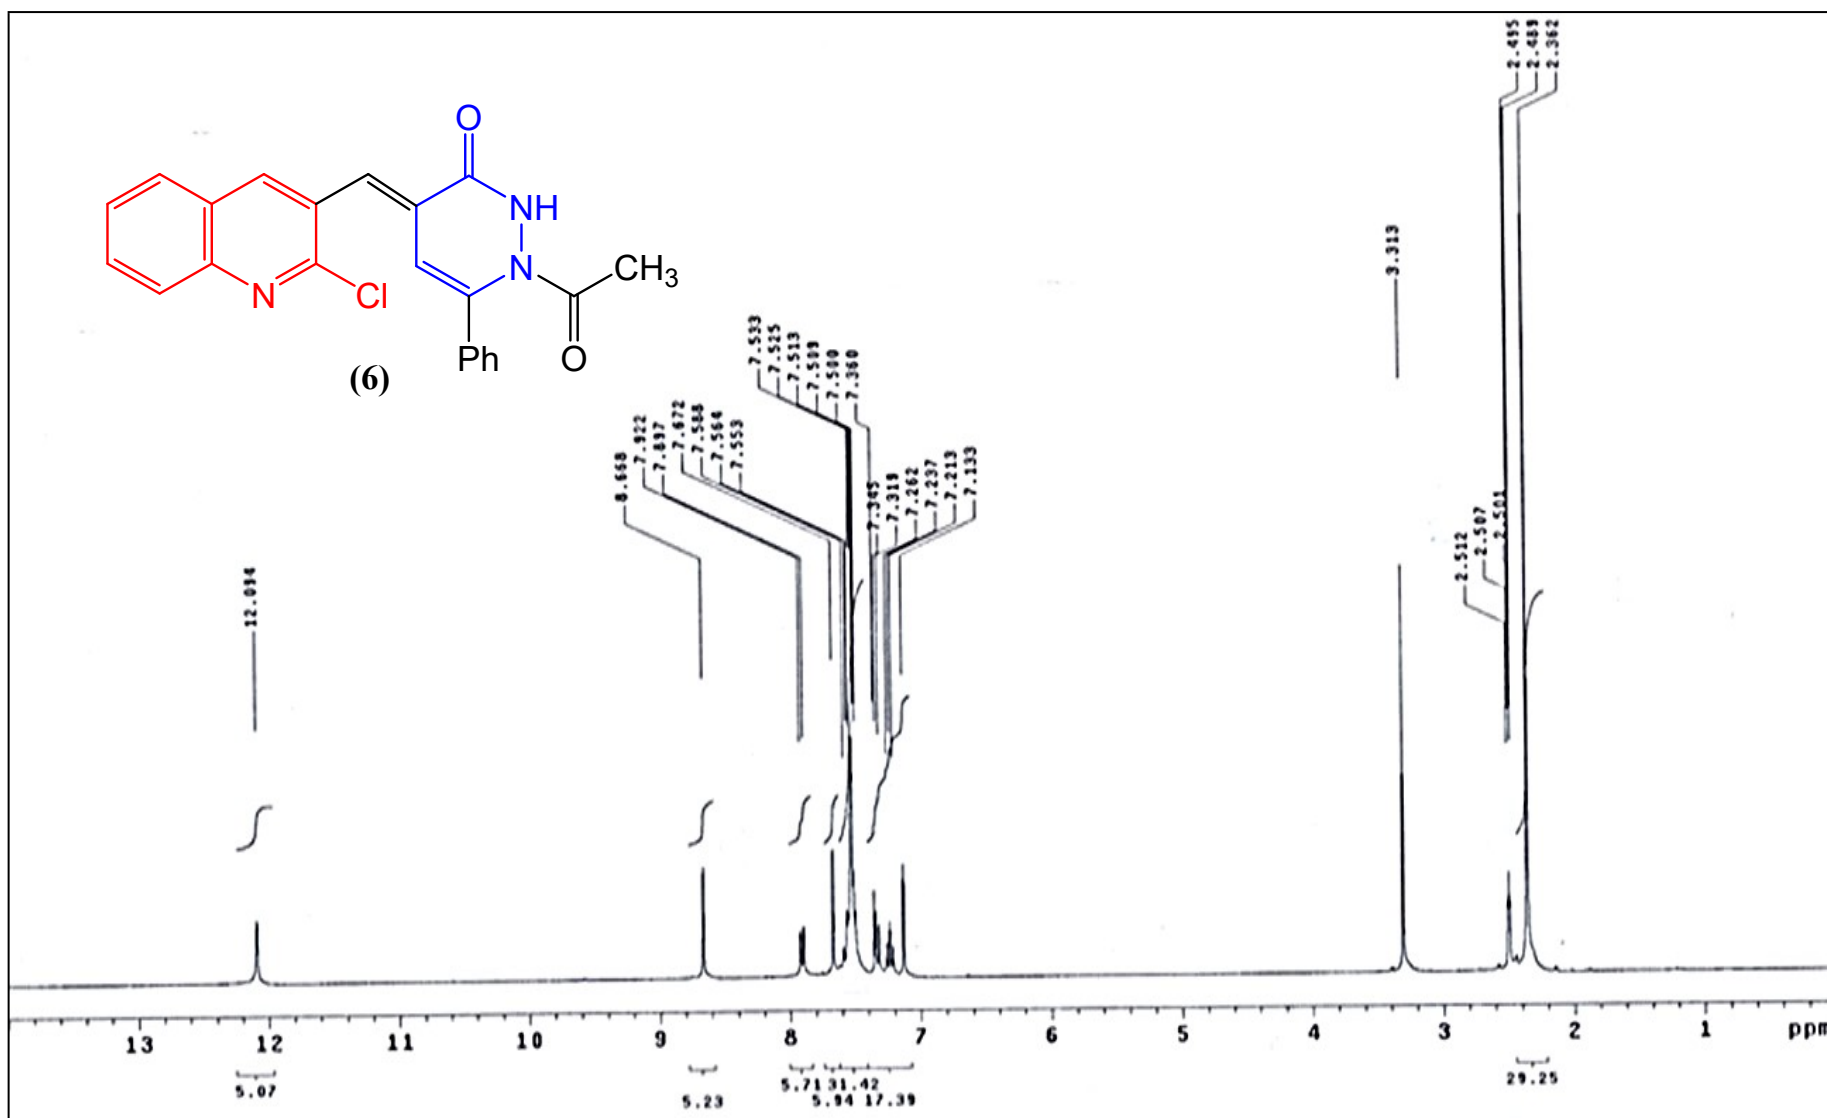

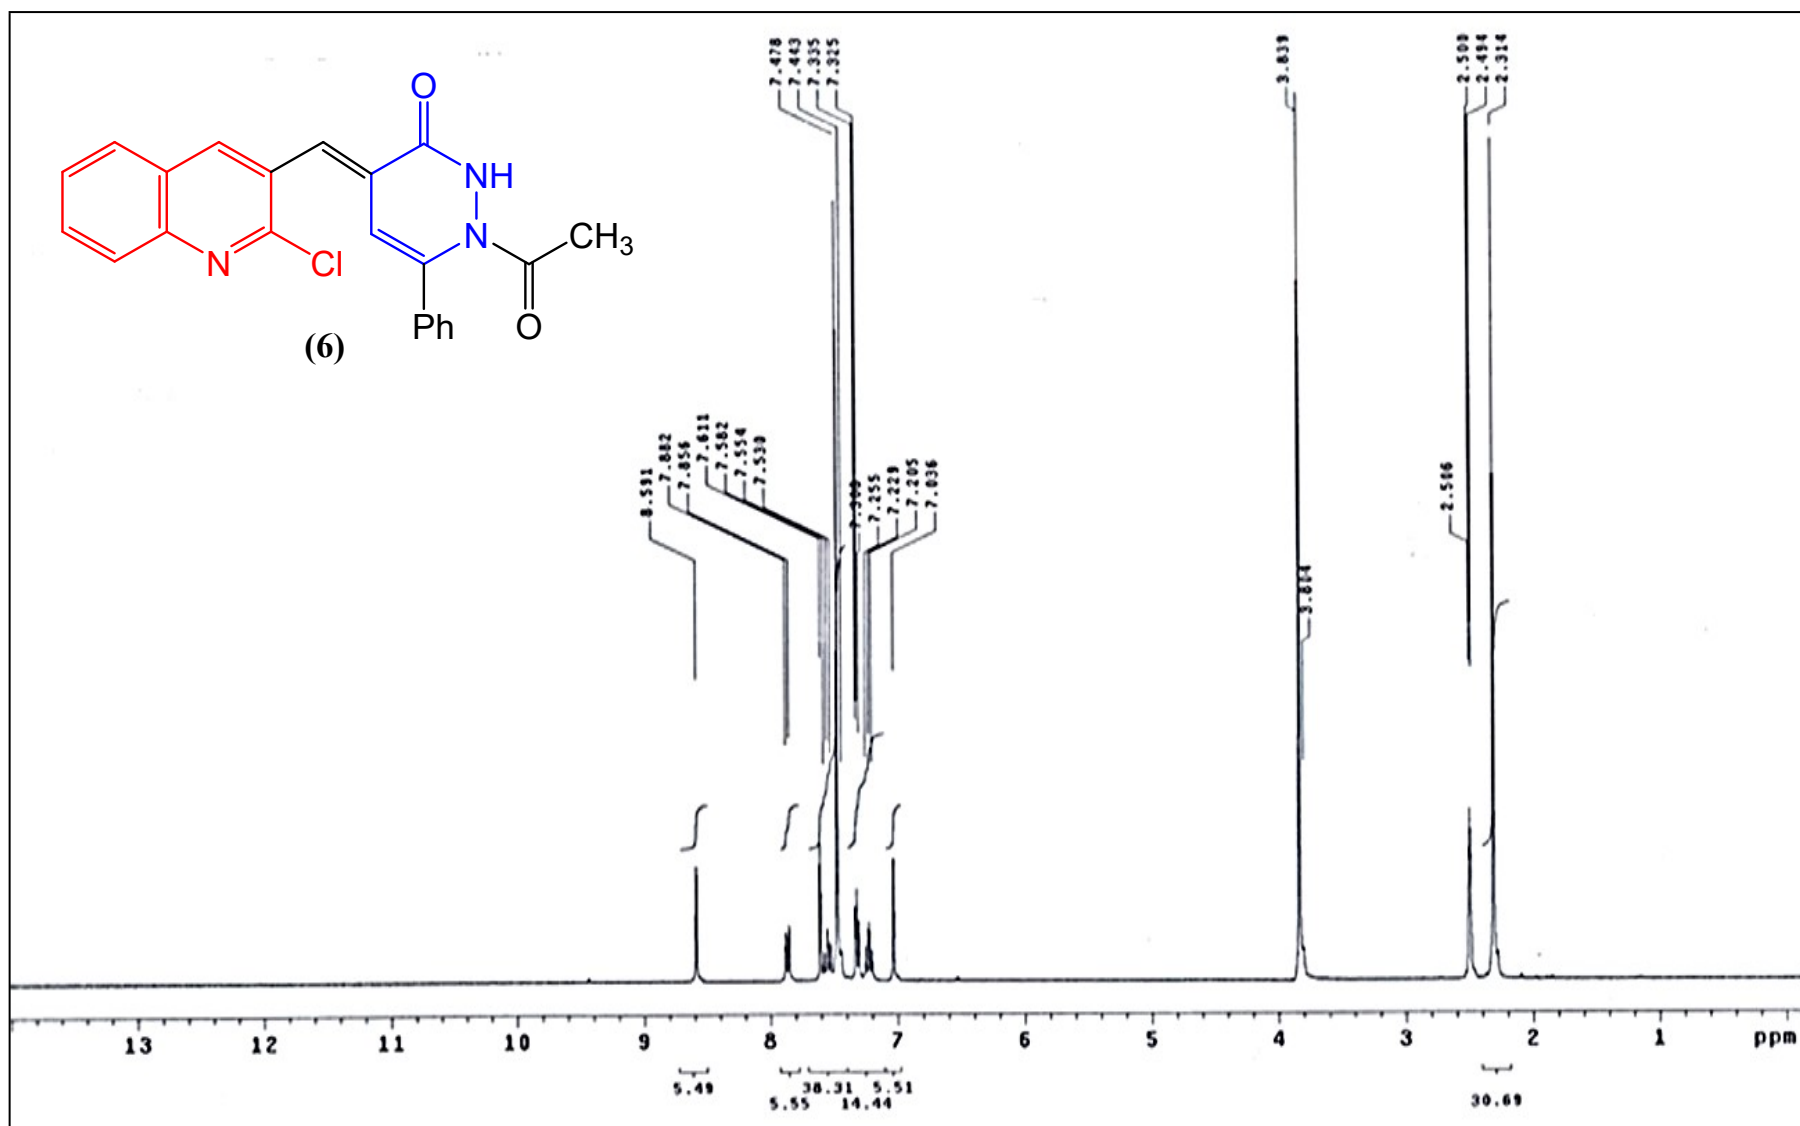

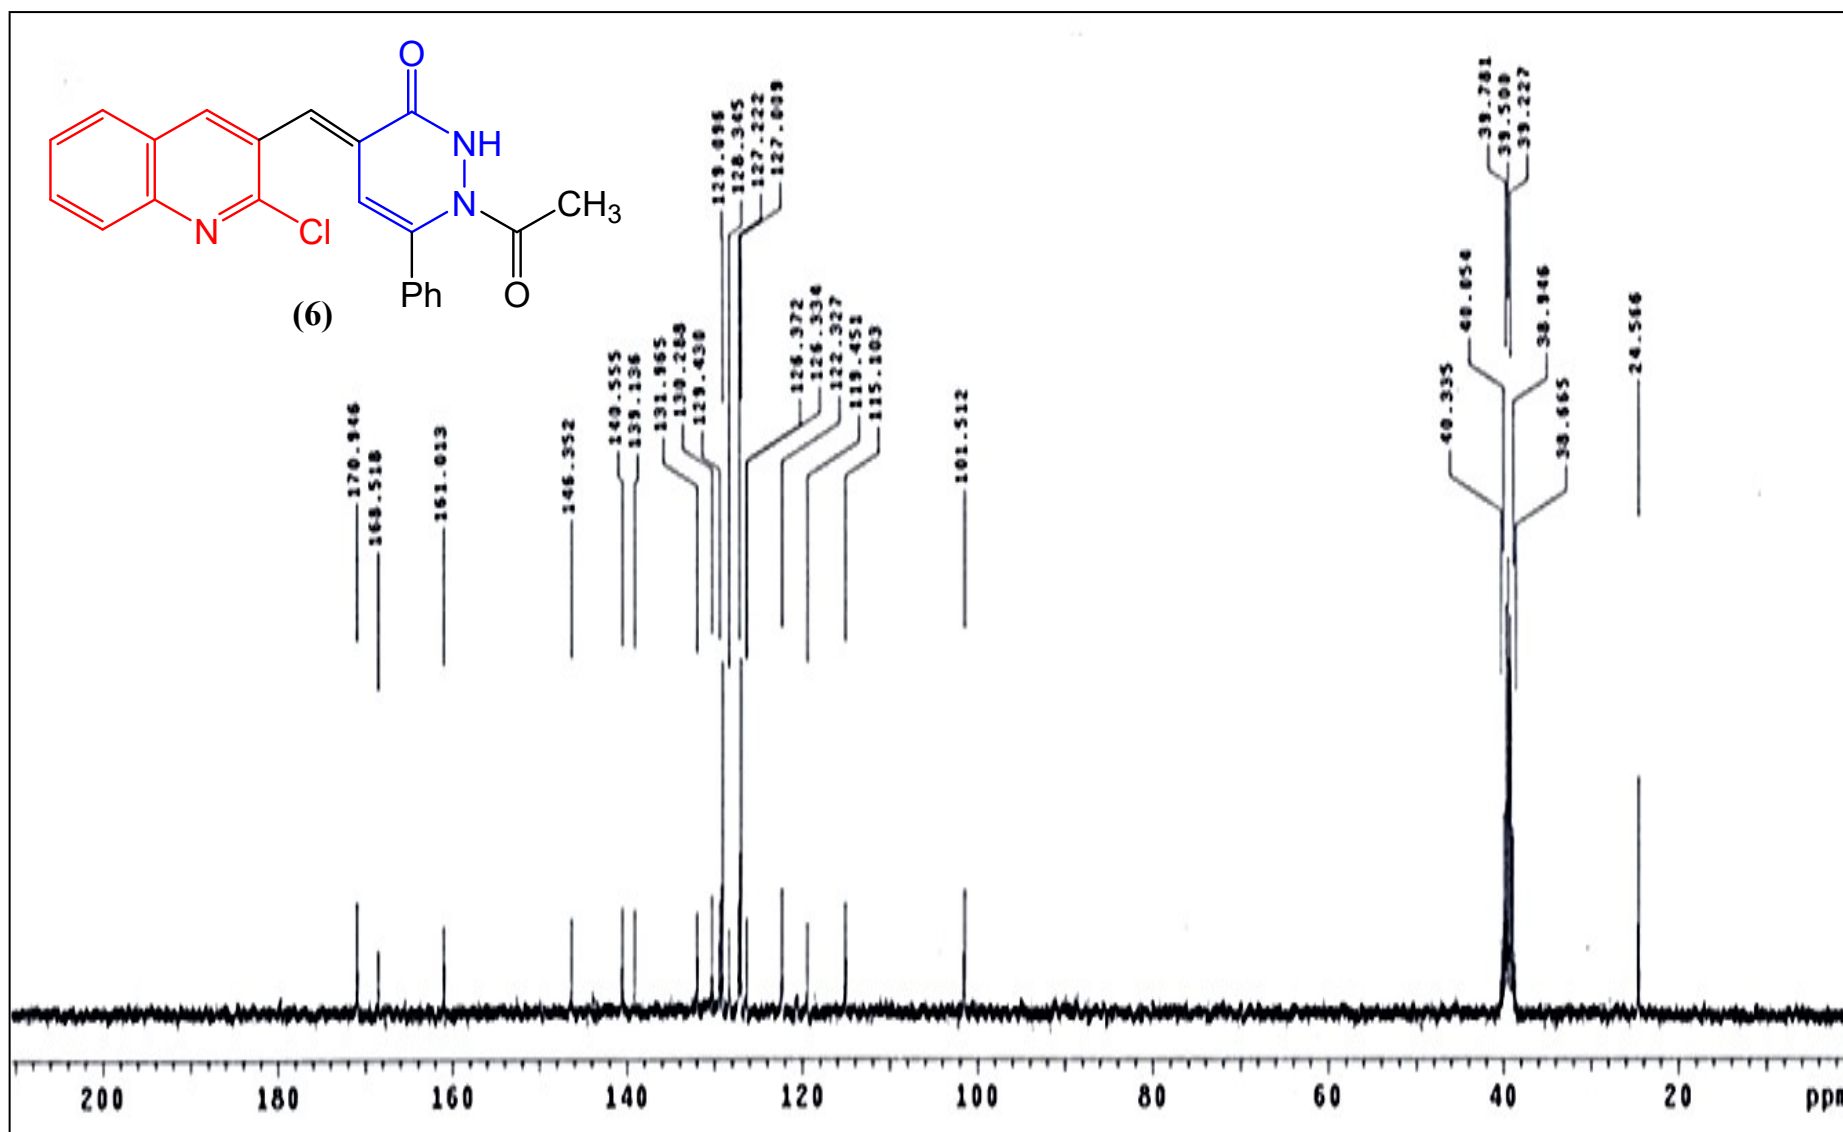

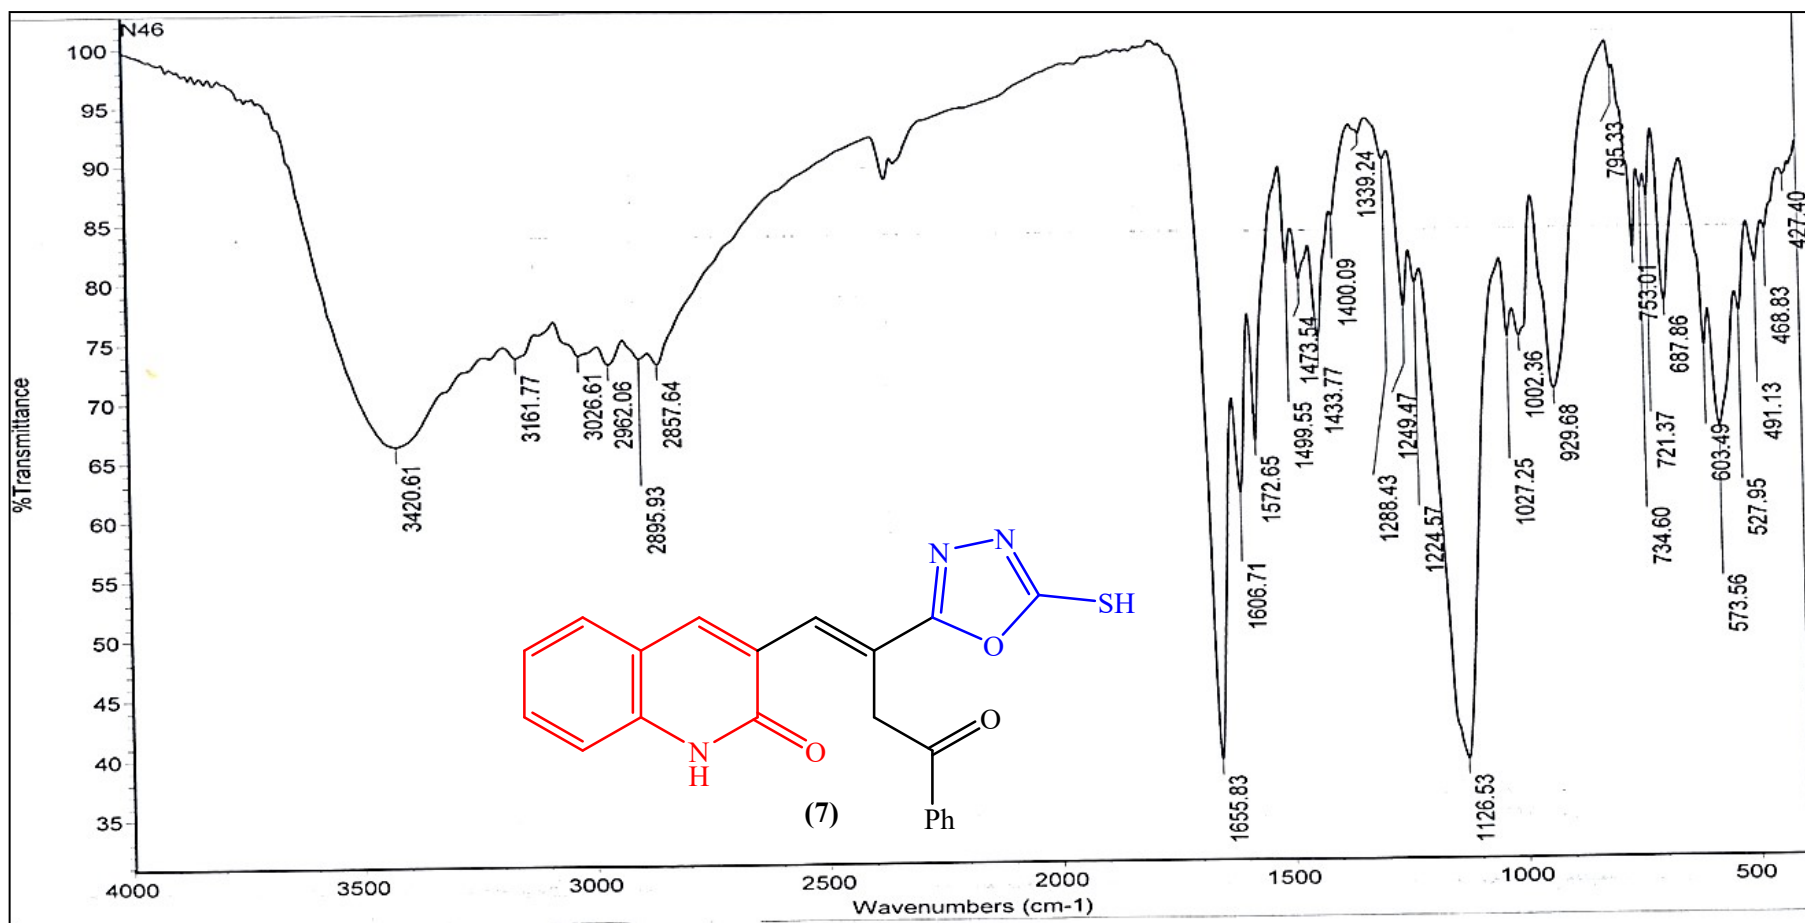

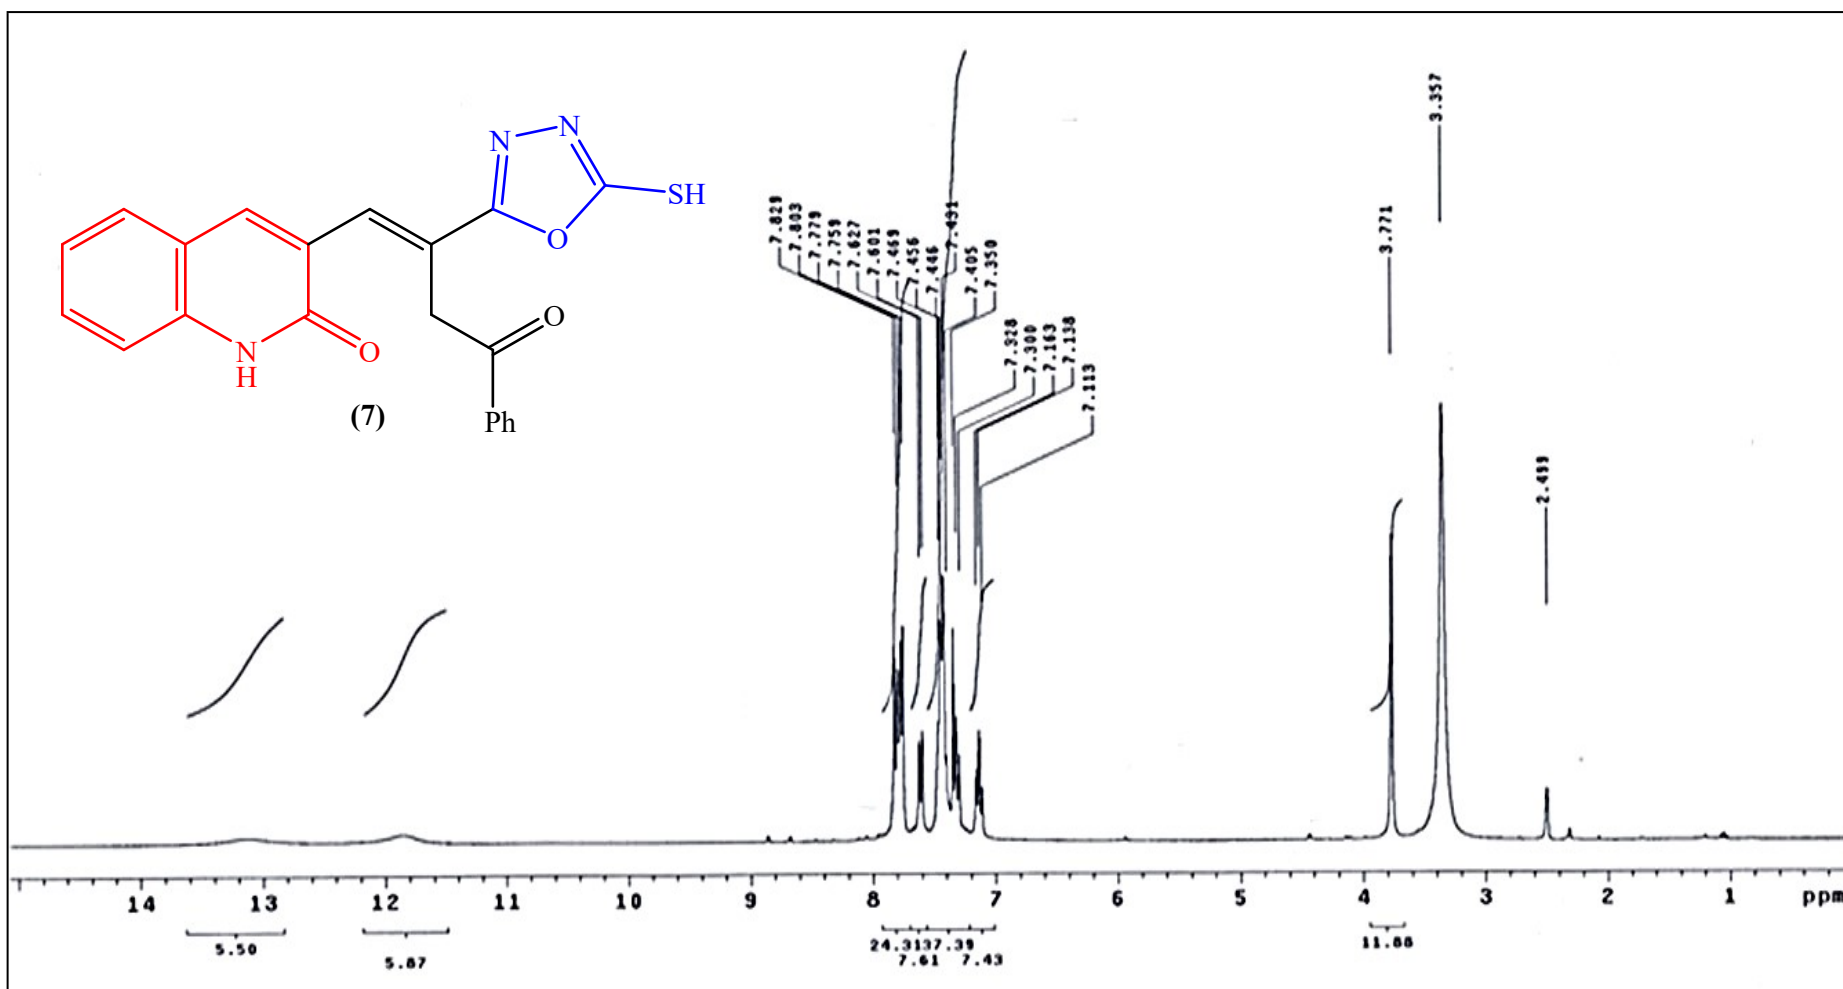

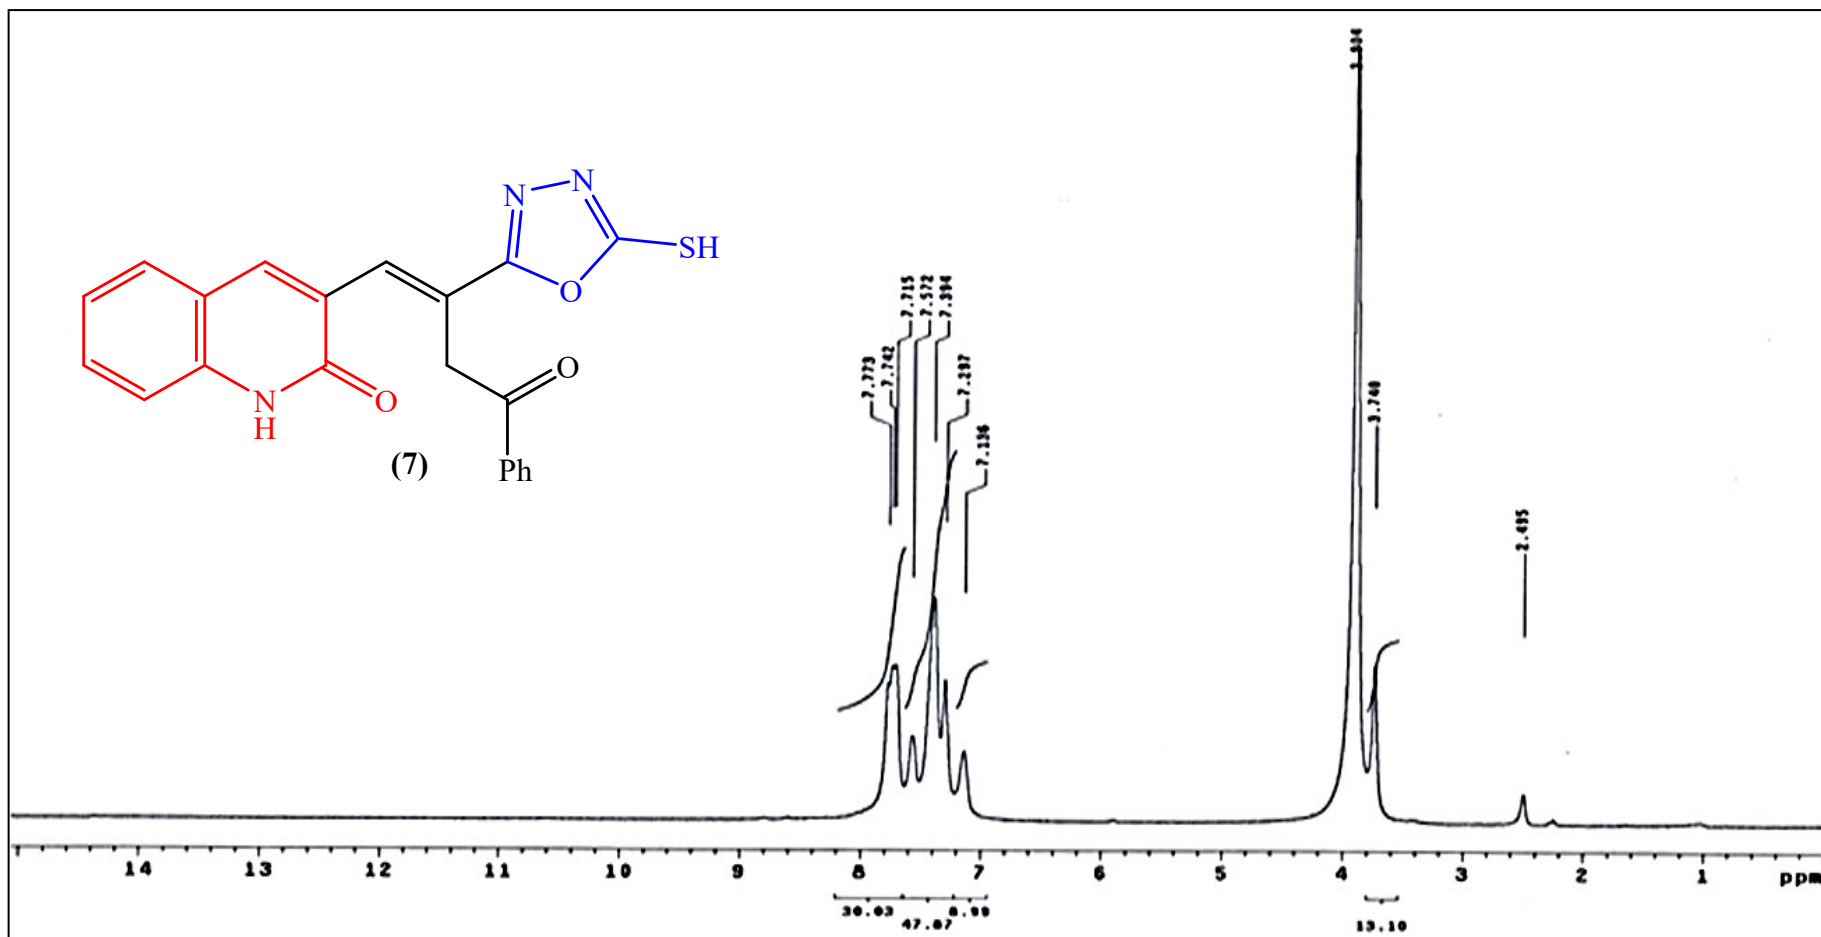

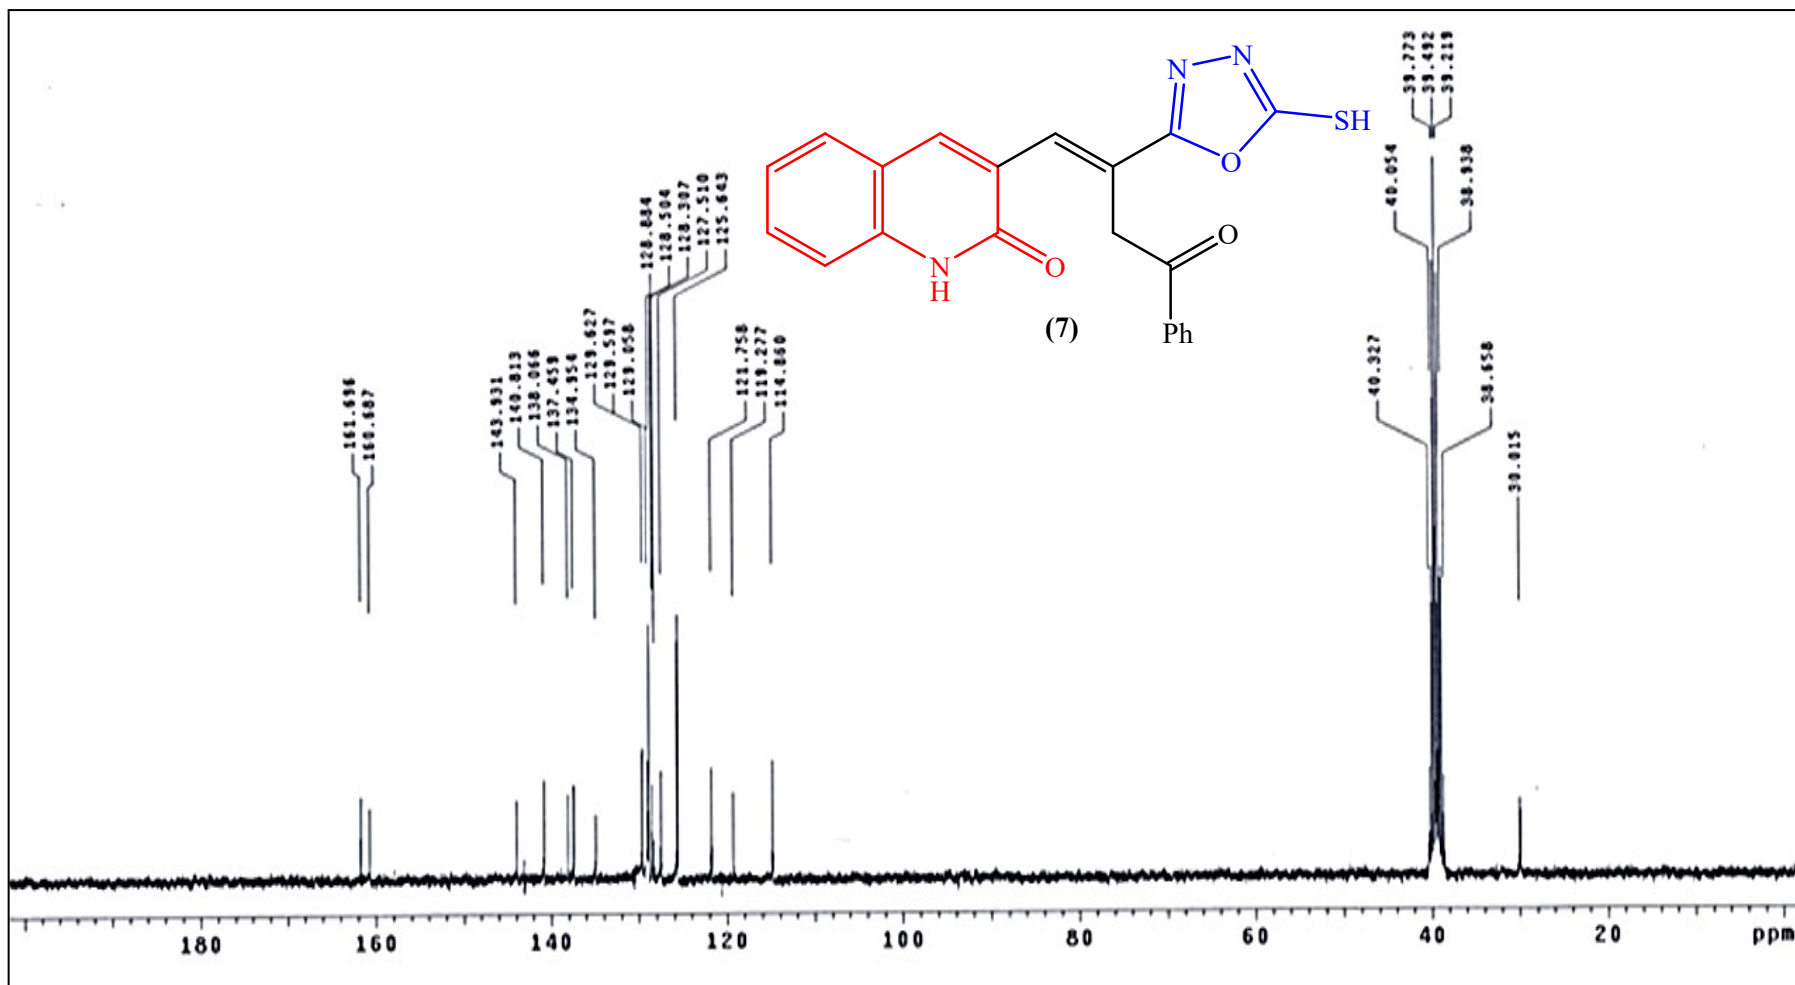



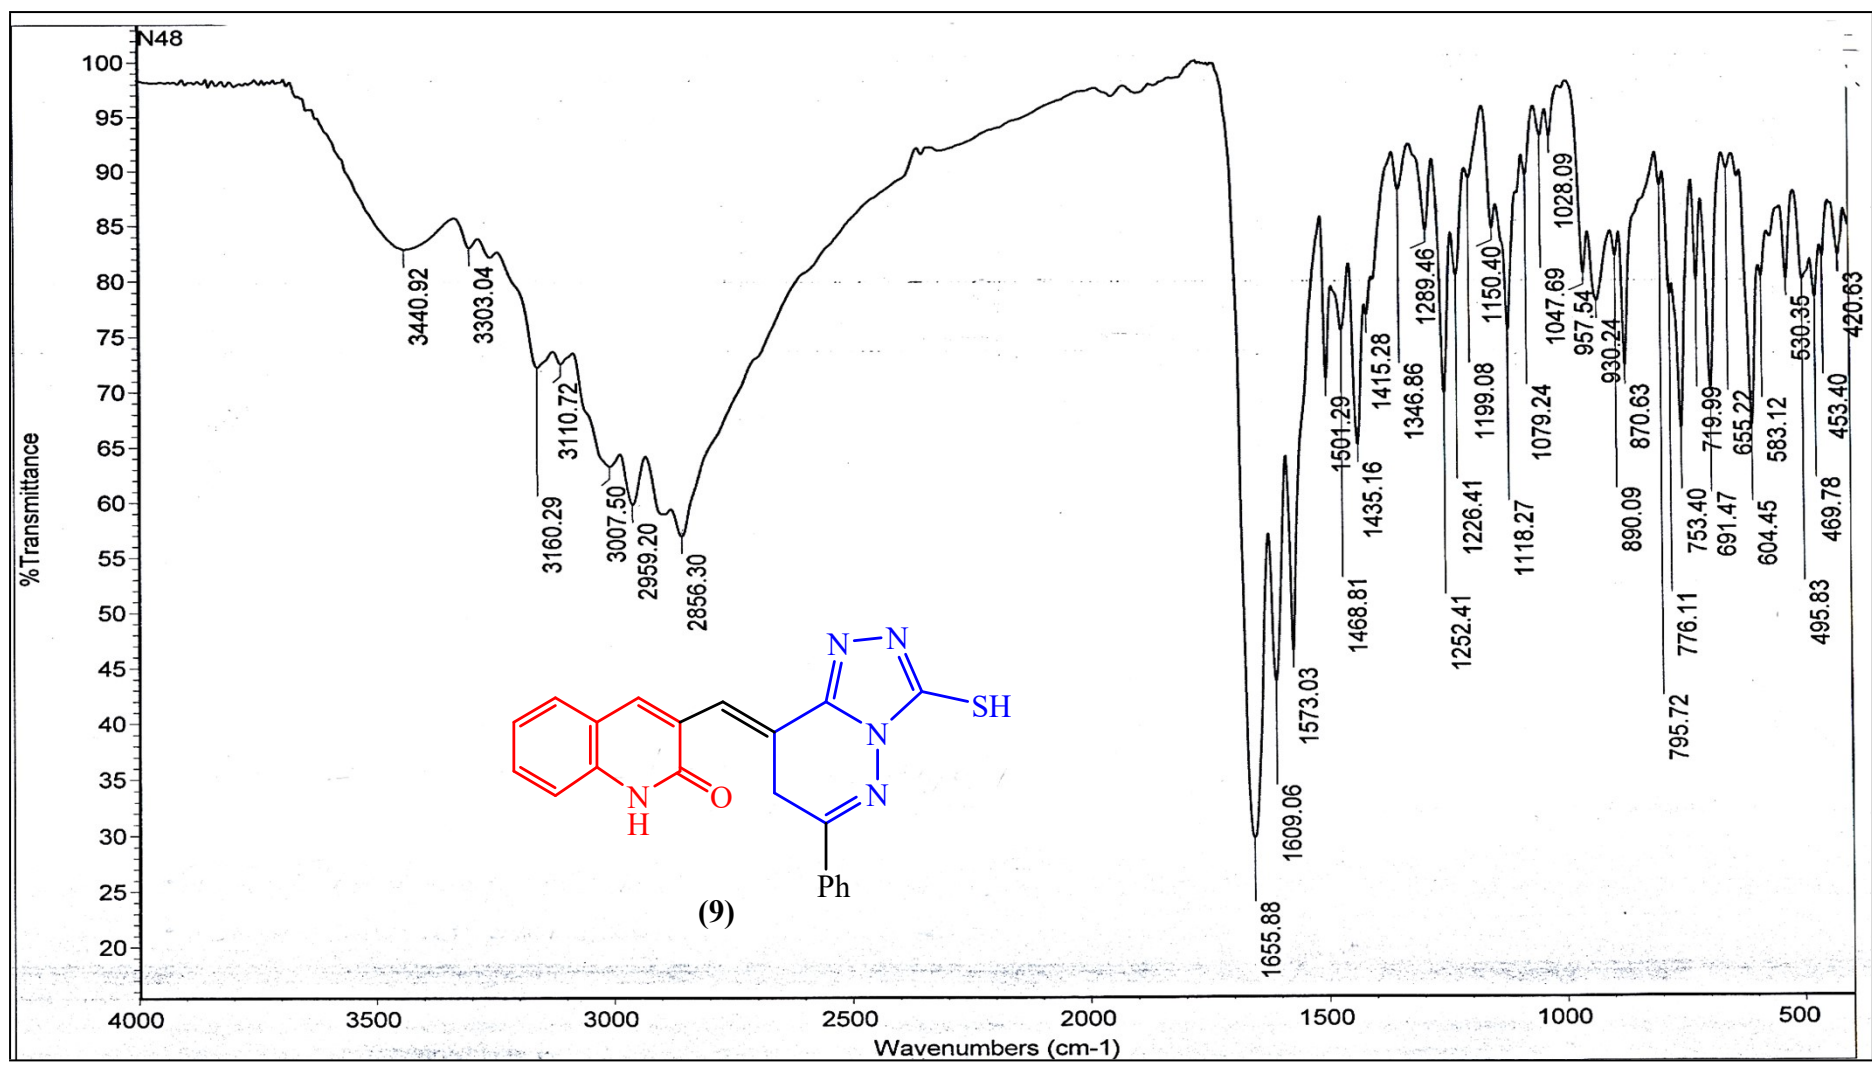

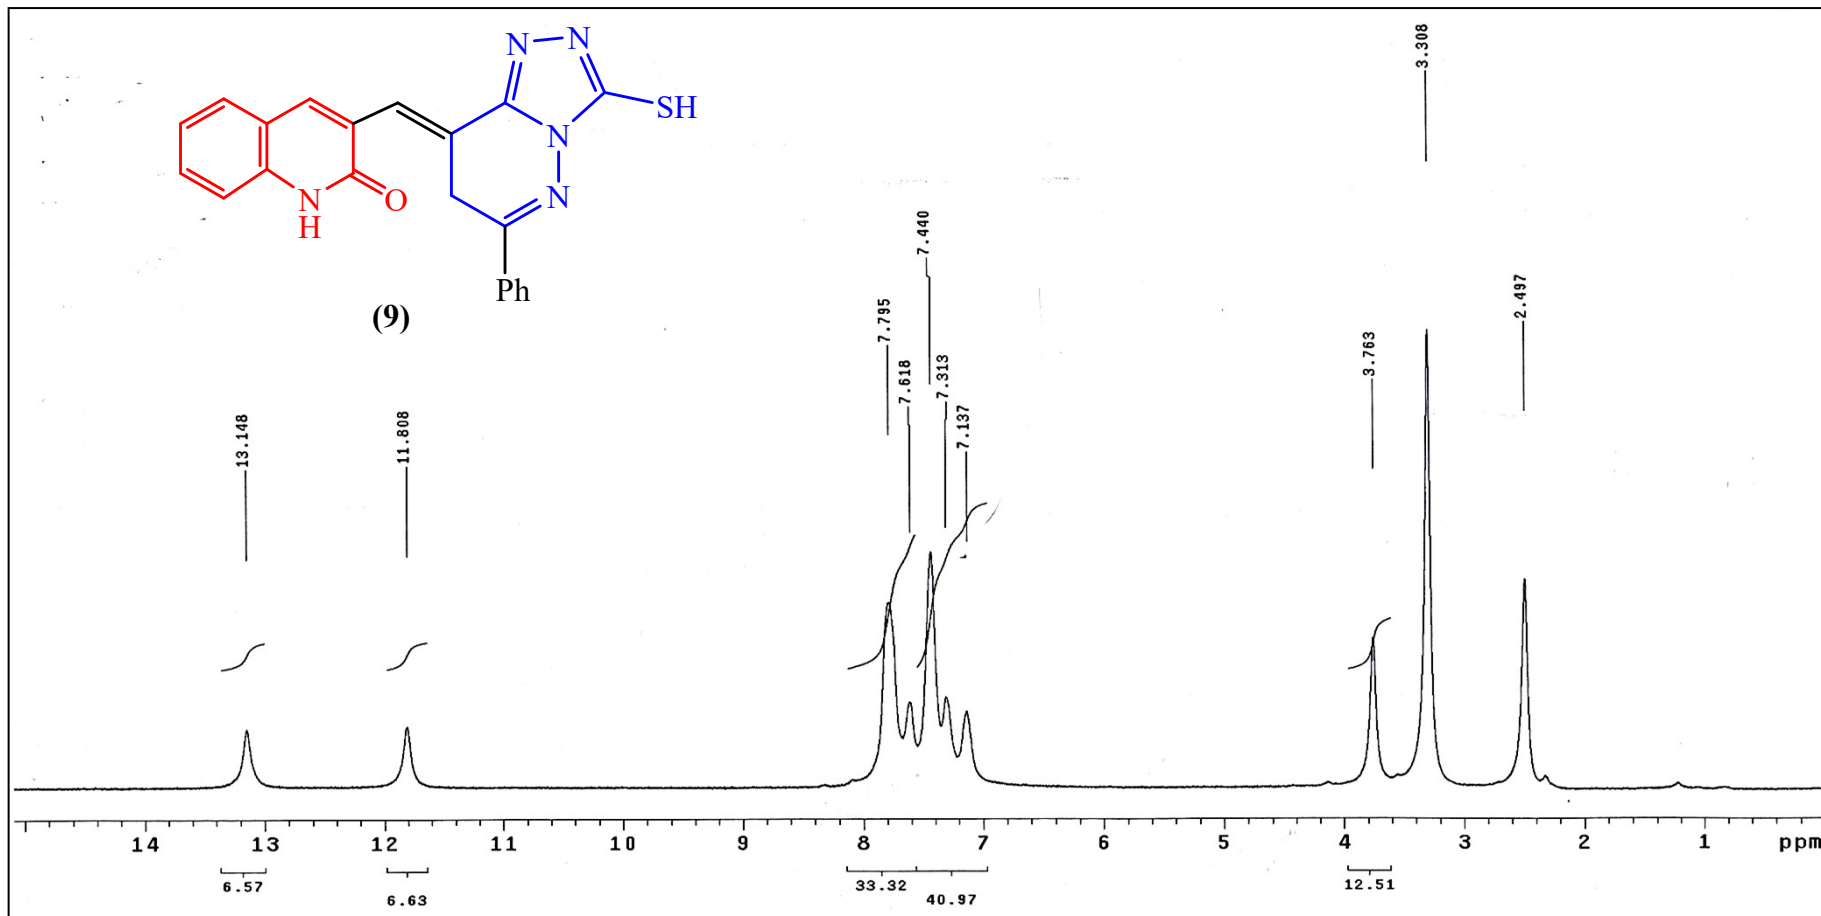

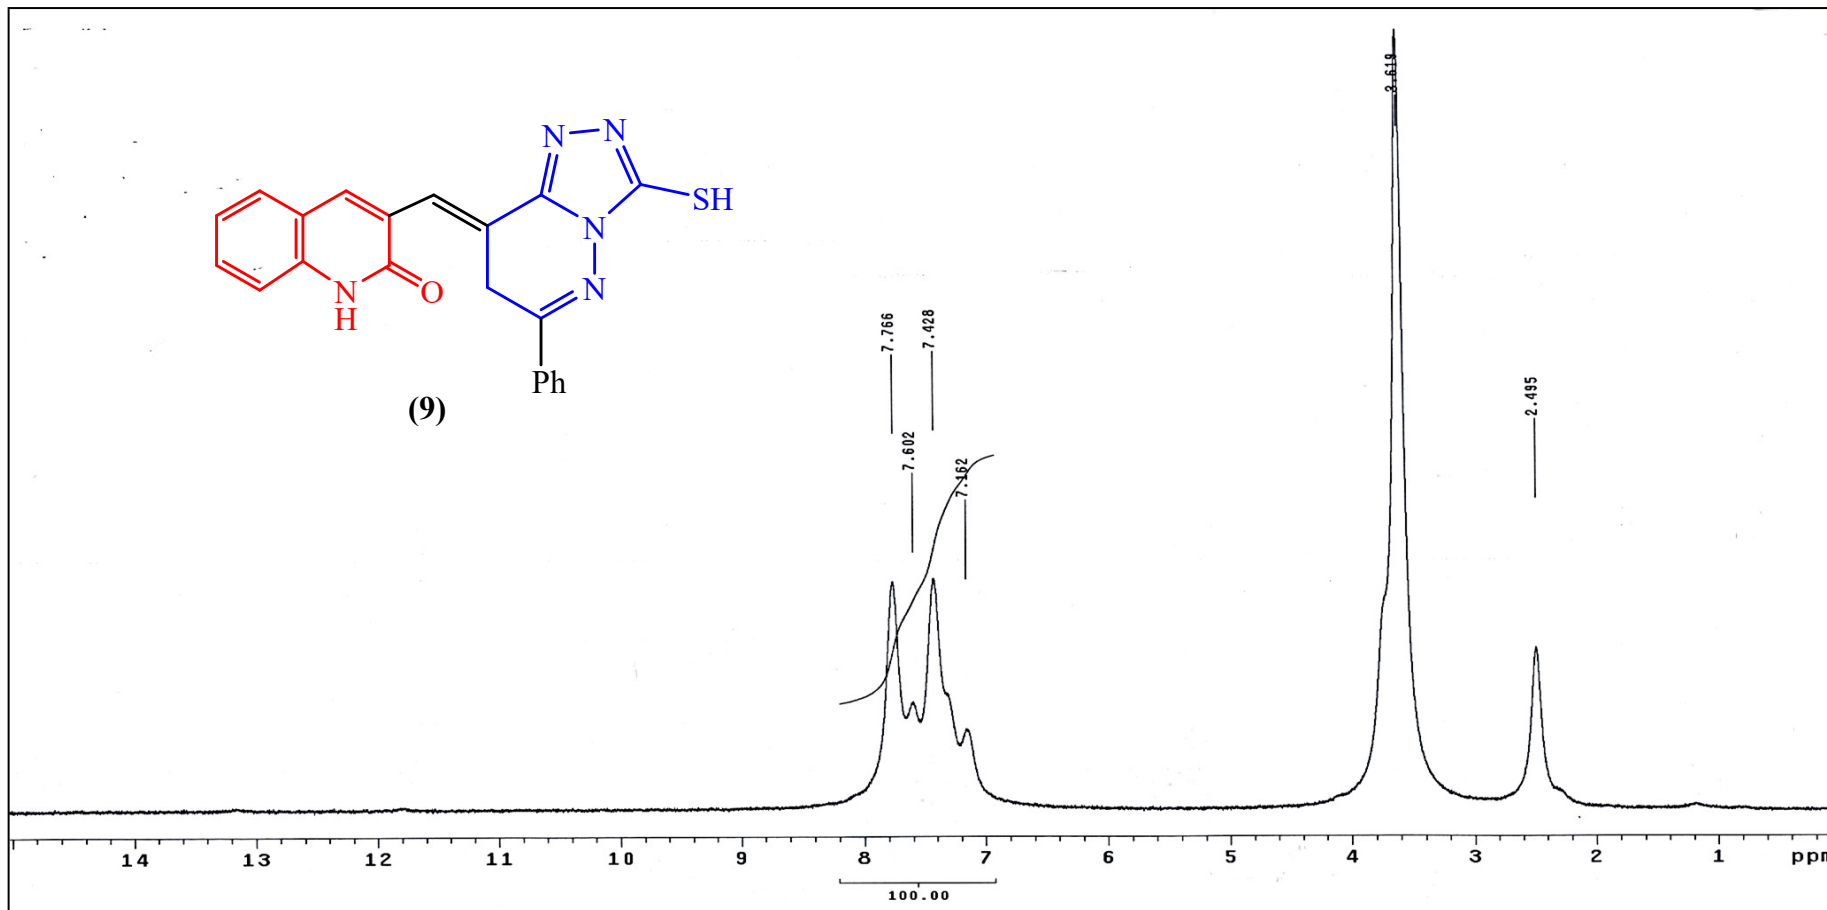

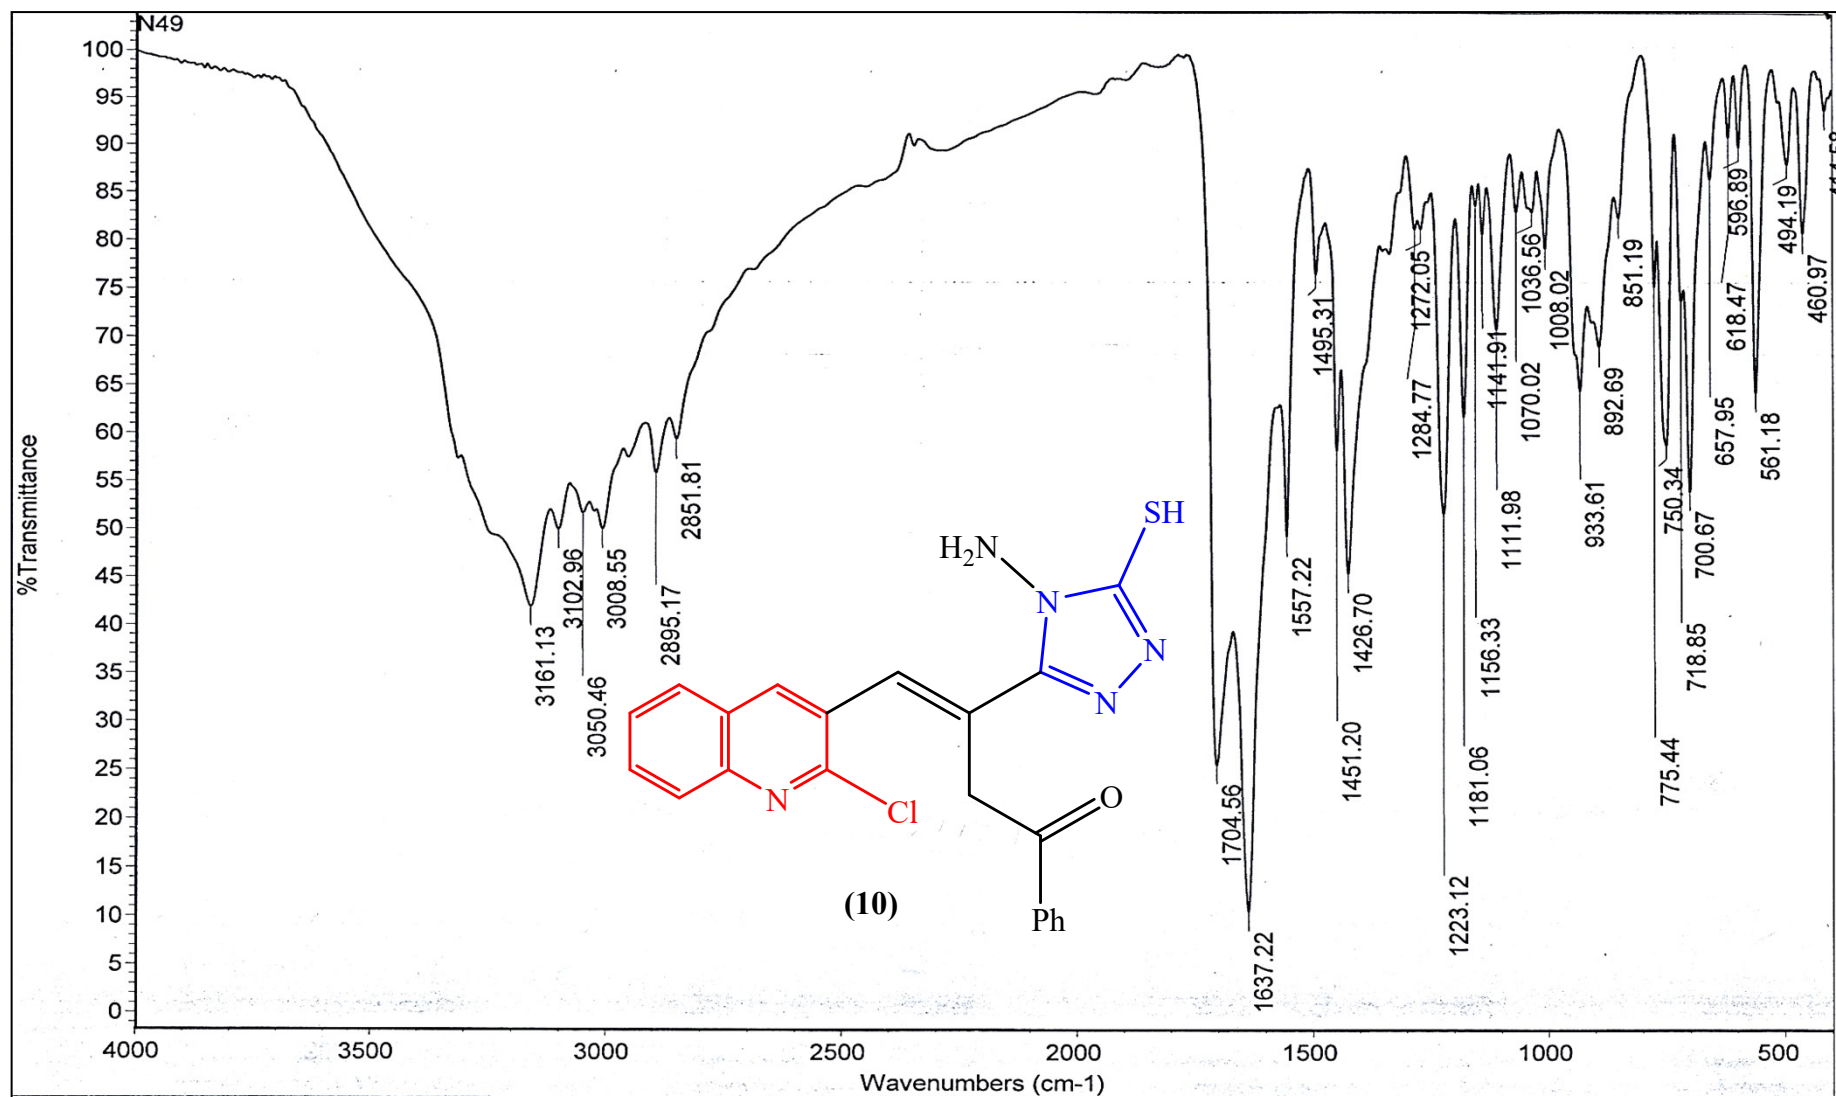

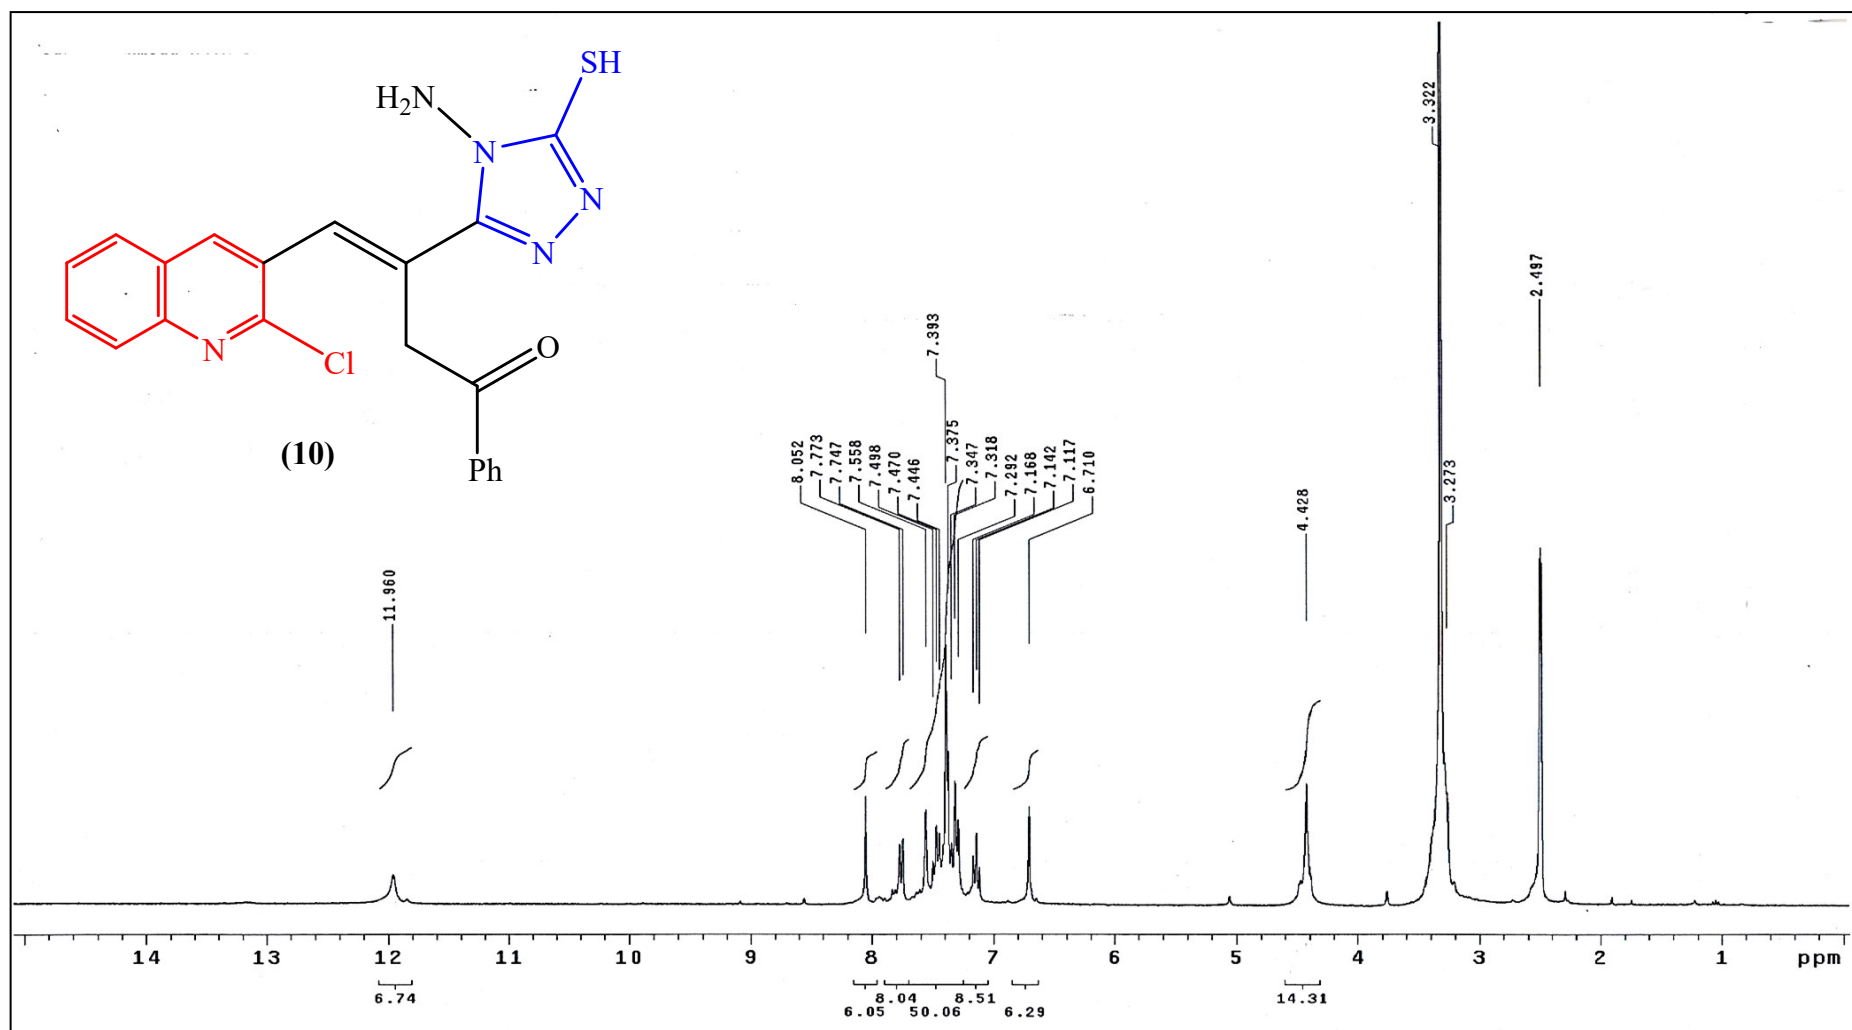

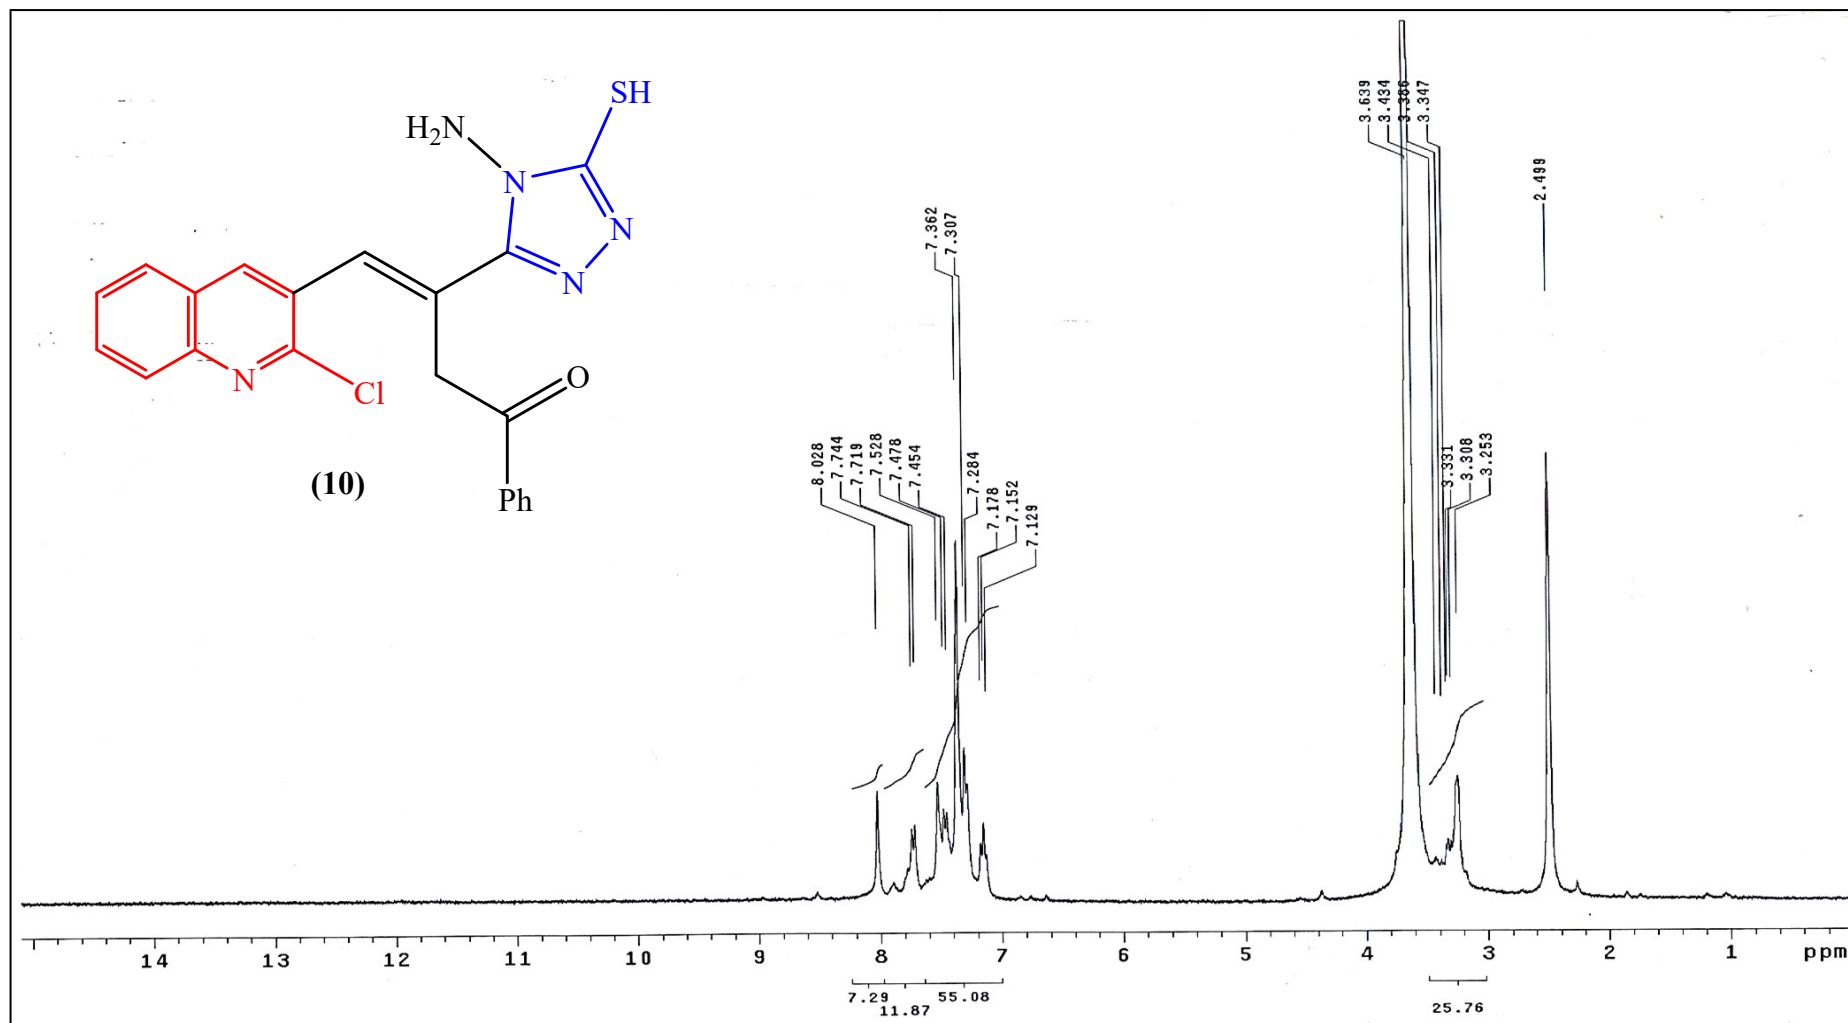

Supplement: d2ra02388a1.pdf [file d2ra02388a1.pdf]
